# Supplementary material for: Early impact of COVID-19 pandemic on paediatric surgical practice in Nigeria: a national survey of paediatric surgeons
Source: PubMed Central journal article supplement — BMJ Paediatr Open. 2020 Sep 1;4(1):e000732. doi: 10.1136/bmjpo-2020-000732 (PMC7467520; doi:10.1136/bmjpo-2020-000732), 2020-09-01
Supplement: bmjpo-2020-000732.draft_revisions.pdf [file bmjpo-2020-000732.draft_revisions.pdf]

# BMJ Paediatrics Open

BMJ Paediatrics Open is committed to open peer review. As part of this commitment we make the peer review history of every article we publish publicly available.

When an article is published we post the peer reviewers' comments and the authors' responses online. We also post the versions of the paper that were used during peer review. These are the versions that the peer review comments apply to.

The versions of the paper that follow are the versions that were submitted during the peer review process. They are not the versions of record or the final published versions. They should not be cited or distributed as the published version of this manuscript.

BMJ Paediatrics Open is an open access journal and the full, final, typeset and author-corrected version of record of the manuscript is available on our site with no access controls, subscription charges or pay-per-view fees (<http://bmjpaedsopen.bmj.com>).

If you have any questions on BMJ Paediatrics Open's open peer review process please email [info.bmjpo@bmj.com](mailto:info.bmjpo@bmj.com)

# BMJ Paediatrics Open

## Early Impact of COVID-19 Pandemic on Paediatric Surgical Practice in Nigeria.

|                               |                                                                                                                                                                                                                                                                              |
|-------------------------------|------------------------------------------------------------------------------------------------------------------------------------------------------------------------------------------------------------------------------------------------------------------------------|
| Journal:                      | <i>BMJ Paediatrics Open</i>                                                                                                                                                                                                                                                  |
| Manuscript ID                 | bmjpo-2020-000732                                                                                                                                                                                                                                                            |
| Article Type:                 | Original research                                                                                                                                                                                                                                                            |
| Date Submitted by the Author: | 16-May-2020                                                                                                                                                                                                                                                                  |
| Complete List of Authors:     | Ogundele, Ibukunolu; Olabisi Onabanjo University Teaching Hospital, Surgery<br>Alakaloko, Felix; Lagos University Teaching Hospital, Surgery<br>Nwokoro, Collins; Olabisi Onabanjo University Teaching Hospital, Surgery<br>Ameh, Emmanuel; National Hospital Abuja, Surgery |
| Keywords:                     | Health services research                                                                                                                                                                                                                                                     |
|                               |                                                                                                                                                                                                                                                                              |

SCHOLARONE™  
Manuscripts

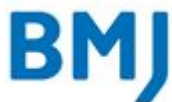

I, the Submitting Author has the right to grant and does grant on behalf of all authors of the Work (as defined in the below author licence), an exclusive licence and/or a non-exclusive licence for contributions from authors who are: i) UK Crown employees; ii) where BMJ has agreed a CC-BY licence shall apply, and/or iii) in accordance with the terms applicable for US Federal Government officers or employees acting as part of their official duties; on a worldwide, perpetual, irrevocable, royalty-free basis to BMJ Publishing Group Ltd ("BMJ") its licensees and where the relevant Journal is co-owned by BMJ to the co-owners of the Journal, to publish the Work in this journal and any other BMJ products and to exploit all rights, as set out in our [licence](#).

The Submitting Author accepts and understands that any supply made under these terms is made by BMJ to the Submitting Author unless you are acting as an employee on behalf of your employer or a postgraduate student of an affiliated institution which is paying any applicable article publishing charge ("APC") for Open Access articles. Where the Submitting Author wishes to make the Work available on an Open Access basis (and intends to pay the relevant APC), the terms of reuse of such Open Access shall be governed by a Creative Commons licence – details of these licences and which [Creative Commons](#) licence will apply to this Work are set out in our licence referred to above.

Other than as permitted in any relevant BMJ Author's Self Archiving Policies, I confirm this Work has not been accepted for publication elsewhere, is not being considered for publication elsewhere and does not duplicate material already published. I confirm all authors consent to publication of this Work and authorise the granting of this licence.

**TITLE PAGE****Title:**

**Early Impact of COVID-19 Pandemic on Paediatric Surgical Practice in Nigeria.**

**Authors:**

**I.O. Ogundele<sup>1</sup>, F.M. Alakaloko<sup>2</sup>, C.C. Nwokoro<sup>1</sup>, E.A. Ameh<sup>3</sup>.**

<sup>1</sup>Division of Paediatric Surgery, Department of Surgery, Olabisi Onabanjo University Teaching Hospital, Ogun state. Nigeria.

<sup>2</sup>Paediatric Surgery Unit, Department of Surgery, Lagos University Teaching Hospital, Lagos State. Nigeria.

<sup>3</sup>Division of Paediatric Surgery, Department of Surgery, National Hospital, Abuja FCT. Nigeria.

**Corresponding Author:**

Ibukunolu O. Ogundele

Department of Surgery, Olabisi Onabanjo University Teaching Hospital, PMB 2001, Sagamu, Ogun State, Nigeria.

E-mail address: [ogundeleibk@gmail.com](mailto:ogundeleibk@gmail.com)

Telephone: +234 802 532 0480

**Competing Interests:** All authors declare no conflicts of interest.

**Funding:** This research received no specific grant from any funding agency in the public, commercial or not-for-profit sectors.

**Contributorship:** IOO and FMA conceived the research idea. IOO, FMA and CCN conducted the survey. IOO, FMA and EAA made the drafts of the manuscript. All the authors made substantive contributions to the intellectual content and reporting of the work described in this article. They all read and approved the final manuscript. IOO and FMA are responsible for the overall content as guarantors.

**Ethics Approval:** Health Research Ethics Committee of Olabisi Onabanjo University Teaching Hospital, Sagamu, Ogun State, Nigeria. OOUTH/HREC/339/2020AP.

**Word Count:** 2 219.

## ABSTRACT

**Introduction** The novel Coronavirus disease has had significant impact on healthcare globally. Knowledge of this virus is evolving, definitive care is not yet known, and mortality is increasing. We assessed its initial impact on paediatric surgical practice in Nigeria, creating a benchmark for recommendations and future reference.

**Methods** Survey of 120 paediatric surgeons from 50 centres to assess socio-demographics and specific domains of impact of COVID-19 on their services and training in Nigeria. Seventy four surgeons adequately responded. Responses have been analysed. Duplicate submissions for centres were excluded by combining and averaging the responses from centres with multiple respondents.

**Results** Forty-six (92%) centres had suspended elective surgeries. All centres continued emergency surgeries but volume reduced in March by 31%. Eleven (22%) centres reported 13 suspended elective cases presenting as emergencies in March, accounting for 2.7% of total emergency surgeries. Nine (18%) centres adopted new modalities for managing selected surgical conditions: non-operative reduction of intussusception in 1(2%), antibiotic management of uncomplicated acute appendicitis in 5(10%), more conservative management of trauma and replacement of laparoscopic appendectomy with open surgery in 3(6%) respectively. Low perception of adequacy of Personal Protective Equipment (PPE) was reported in 35(70%) centres. Forty (80%) centres did not offer telemedicine for patients follow up. Twenty-nine (58%) centres had suspended academic training. Perception of safety to operate was low in 37(50%) respondents, indifferent in 24.3% and high in 25.7%.

**Conclusion** Majority of paediatric surgical centres reported cessation of elective surgeries whilst continuing emergencies. There is however an acute decline in the volume of emergency surgeries. Adequate PPE need to be provided and preparations towards handling backlog of

1  
2  
3 elective surgeries once the pandemic recedes. Further study is planned to more conclusively  
4  
5 understand the full impact of this pandemic on children's surgery.  
6  
7  
8  
9  
10

11 **Key words:** pandemic, COVID-19, children's surgery.  
12  
13  
14  
15  
16  
17  
18  
19  
20  
21  
22  
23  
24  
25  
26  
27  
28  
29  
30  
31  
32  
33  
34  
35  
36  
37  
38  
39  
40  
41  
42  
43  
44  
45  
46  
47  
48  
49  
50  
51  
52  
53  
54  
55  
56  
57  
58  
59  
60

Confidential: For Review Only

## Key Messages

Anecdotal evidence suggests that elective surgeries in children have been suspended due to COVID-19 pandemic.

Our study shows that most centres have suspended elective surgeries. All centres continued emergency surgeries but the volume reduced by 31% in March 2020. Moreover, 2.7% of the emergency surgeries were suspended elective cases presenting as emergencies.

Almost 20% of centres have newly adopted non-operative modalities for managing selected emergency surgical conditions.

This data shows an urgent need for consensus guidelines for emergency services and protocols for handling backlog of elective surgeries in children once the pandemic recedes.

Outcome of the modifications in treatment may be subject to future research.

## BACKGROUND

Corona virus disease 19 (COVID-19) is a highly transmissible novel viral illness, caused by severe acute respiratory syndrome coronavirus 2 (SARS-CoV-2) (1). It was reported to have emerged in Wuhan, China, in December 2019 but later spread to other parts of China and other countries of the world (2). This disease poses a huge challenge to health care systems around the world. The U.S. Department of Health and Human Services stated in its 2017 Pandemic Influenza plan update that “emerging viral pandemics can place extraordinary and sustained demands on public health and health systems and on providers of essential community services” (3). The effect may be more profound in regions with already limited resources and fragile health infrastructure. The aim of this study was to carry out a survey of paediatric surgeons in a resource limited setting to assess early effects of the COVID-19 pandemic on their practice in the initial stages of the outbreak. Data obtained would be used for recommendations and future reference.

## METHODS

Relevant information was obtained from paediatric surgeons (consultants and senior registrars) currently practising in Nigeria, using a pre-tested questionnaire designed on Microsoft Word version 10 (Microsoft Seattle, WA, USA) and transcribed to google form. The questions were based on 5-point Likert scale (Strongly agree, agree, neither agree nor disagree, disagree, strongly disagree). We circulated the forms to the predetermined group of specialists by email and online chat rooms and kept them open from 10th to 17th April 2020. Daily reminders were also sent.



1  
2  
3 Participants were required to provide socio-demographic data, information on patient traffic  
4 and decision on management of specific conditions, availability of PPE, impact on surgeon's  
5 psyche, their academic programs and institutions infrastructure.  
6  
7  
8

9  
10 A total of 120 paediatric surgeons were sent the survey. Eighty-three paediatric surgeons  
11 responded but 74 were adequately completed. For the purpose of analysis, the 5-point Likert  
12 scale was reduced to 3 points (Agree, neutral, disagree).  
13  
14  
15

16  
17 Duplicate submissions for centres were excluded by combining and averaging the responses  
18 from centres with multiple responses.  
19  
20  
21

22  
23 Responses were analysed using SPSS version 22 and presented as categorical data and  
24 percentages.  
25  
26  
27

28  
29 **Patient and Public Involvement statement:** This research was done without patient  
30 involvement. Patients were not invited to comment on the study design and were not consulted  
31 to develop patient relevant outcomes or interpret the results. Patients were not invited to  
32 contribute to the writing or editing of this document for readability or accuracy.  
33  
34  
35  
36

37  
38 **Ethics Approval:** Obtained from the Health Research Ethics Committee of Olabisi Onabanjo  
39 University Teaching Hospital, Sagamu, Ogun State, Nigeria.  
40  
41  
42  
43

## 44 45 46 47 **RESULTS**

### 48 49 **Demographics**

50  
51 The response rate was 74(61%). The 74 completed responses represented 50 centres across the  
52 country with 62 (83.8%) Males and 12 (16.2%) Females; 45(60.8%) consultants and 29(39.2%)  
53 senior registrars. Forty-eight (96%) centres are public owned health facilities while 2(4%) are  
54 privately owned; 39 (78%) are teaching hospitals, 10(20%) federal medical centres (tertiary  
55  
56  
57  
58  
59  
60

hospitals not affiliated to universities) and 1(2%) specialist hospital. Table 1 shows the demographic characteristics of respondents.

**Table: 1** Socio-demographic characteristics of respondents

| Characteristics of respondents | Scores<br>N=74 | Percentage |
|--------------------------------|----------------|------------|
| 1.Cadre                        |                |            |
| Consultant                     | 45             | 60.8       |
| Senior-Registrar               | 29             | 39.2       |
| 2.Gender                       |                |            |
| Male                           | 62             | 83.8       |
| Female                         | 12             | 16.2       |
| 3.Work place                   | N=50           |            |
| Public                         | 48             | 96         |
| Private                        | 2              | 4          |
| 4.Type of Health facility      | N=50           |            |
| Teaching hospital              | 39             | 78         |
| Federal Medical Centre         | 10             | 20         |
| General/Specialist Hospital    | 1              | 2          |

### Impact on Surgeries

Elective surgeries had been suspended in 46(92%) centres at the time of this survey. There was a steady decline in the average number of elective surgeries done over 5 months between November 2019 with 993(24.8%) and March 2020 with 420(10.5%) cases. Similar trend was

observed with emergency surgeries which reduced from 822(24.9%) in November 2019 to 485(14.7%) in March 2020 as shown in table 2. Comparatively, there were more elective than emergency surgeries per month until March (Figure 1).

**Table 2: Distribution of mean number of surgeries done in the last five months**

| Month    | Emergency surgeries<br>Mean x No of centers<br>N (%) | Elective surgeries<br>Mean x No of centers<br>N (%) | Total       |
|----------|------------------------------------------------------|-----------------------------------------------------|-------------|
| Nov 2019 | 822 (24.9)                                           | 993 (24.8)                                          | 1815 (49.7) |
| Dec 2019 | 688 (20.9)                                           | 939 (23.4)                                          | 1627 (44.3) |
| Jan 2020 | 685 (20.8)                                           | 864 (21.5)                                          | 1549 (42.3) |
| Feb 2020 | 615(18.7)                                            | 793(19.8)                                           | 1408 (38.5) |
| Mar 2020 | 485 (14.7)                                           | 420 (10.5)                                          | 905 (25.2)  |
| Total    | 3295(100)                                            | 4009(100)                                           | 7304(200)   |

Eleven (22%) centres reported at least one suspended elective case presenting as emergency in March. There were 13 of such patients accounting for an estimated 2.7% of the total emergency surgeries. They included incarcerated inguinoscrotal hernias (10), sub-acute appendicitis (2) and previously decompressing anovestibular fistula with intestinal obstruction (1).

Twenty (40%) centres suspended their elective surgeries less than 2 weeks prior to the survey in April, 26(52%) centres stopped a month earlier and 4(8%) had suspended their elective list for over a month.

Adopted protocols for urgent cases by the centres was to immediately operate in 31(62%), delayed intervention in 12(24%), masterly inactivity in 2(4%) and follow up in 5(10%) as shown in Figure 2.

## Impact on Surgeons

Paediatric surgeons perception of safety to operate during the pandemic rated low in 37(50%), indifferent in 18(24.3%) and high in 19(25.7%) respondents. The number of surgeons with high perception of safety to operate (25.7%) was higher than those highly willing to operate on COVID-19 positive patients (20.3%) as shown in Figure 3. No member of the surgical team had tested positive for COVID-19.

Fifty-seven (77%) agreed to a need for paediatric surgeons to have additional training in management of surgical patients during epidemics, 6(8.1%) were neutral, while 11(14.9%) disagreed. Those willing to attend such training were 47(63.5%), 15(20.3%) were neutral and 12(16.2%) were unwilling ( $P= 0.004$ ).

There was no statistically significant difference when their perception of safety to operate was correlated with willingness to operate generally, same with perception of adequacy of PPE and their perception of how good their institution is coping with the COVID-19 pandemic. The number of years in practice also showed no statistically significant correlation with the perception of safety to operate during the pandemic (Table 3).

## Changes in Management Modality

Nine (18%) centres have newly adopted non-operative modalities for managing selected surgical conditions in response to the pandemic. One (2%) centre adopted non-operative reduction of intussusception while 5(10%) centres adopted management of uncomplicated acute appendicitis with antibiotics and 3(6%) took a more conservative approach to management of trauma. Three (6%) centres replaced laparoscopic appendectomy with open surgery.

**Table 3: Correlation of various perception responses**

| Perceptions                                  | Answers     |     |             |    | Total | Std error | P value |
|----------------------------------------------|-------------|-----|-------------|----|-------|-----------|---------|
|                                              |             | Yes | Indifferent | No |       |           |         |
| Safety vs Willingness to operate             | High        | 1   | 4           | 7  | 12    | 0.141     | 0.876   |
|                                              | Indifferent | 2   | 2           | 9  | 13    |           |         |
|                                              | Low         | 5   | 3           | 17 | 25    |           |         |
|                                              | Total       | 8   | 9           | 33 | 50    |           |         |
| Training need vs willingness to attend       | High        | 27  | 7           | 5  | 39    | 0.127     | 0.004   |
|                                              | Indifferent | 1   | 3           | 1  | 5     |           |         |
|                                              | Low         | 1   | 3           | 2  | 6     |           |         |
|                                              | Total       | 29  | 13          | 8  | 50    |           |         |
| Adequacy of PPE vs Coping institution        | High        | 2   | 0           | 4  | 6     | 0.145     | 0.044   |
|                                              | Indifferent | 1   | 6           | 6  | 13    |           |         |
|                                              | Low         | 1   | 5           | 25 | 31    |           |         |
|                                              | Total       | 4   | 11          | 35 | 50    |           |         |
| No of years in practice vs safety to operate | 1-10        | 6   | 9           | 19 | 34    | 0.147     | 0.276   |
|                                              | 11-20       | 6   | 4           | 3  | 13    |           |         |
|                                              | >20years    | 0   | 0           | 3  | 3     |           |         |
|                                              | Total       | 12  | 13          | 25 | 50    |           |         |

### Impact on Institutions, Supplies and Outpatient Clinics

Forty-two (84%) centres had designated isolation wards but only 2(4%) had COVID-19 positive children on admission and none had managed COVID-19 positive children with surgical condition in their facility at the time of this survey. There was low perception of adequacy of PPE for theatre staff both at the time of survey in 35(70%) centres and at 3 months afterwards in 40(80%) centres as depicted in Figure 4. Forty (80%) centres do not offer hospital

1  
2  
3 powered telemedicine services for patients follow up despite lockdown on outpatient clinics.

4  
5 The pie chart in Figure 5 shows a low rating of how institutions are coping with the pandemic.

### 6 7 8 **Impact on Academic Training Programs**

9  
10  
11 Twenty-nine (58%) centres had suspended academic training during the pandemic, 13(26%)  
12 engaged “WhatsApp” chat rooms, while 3(6%) made use of Video-conferencing and 5(10%)  
13 still carried out their academic training through physical meetings but with social distancing  
14 (Figure 6).  
15  
16  
17  
18  
19  
20  
21  
22  
23

## 24 **DISCUSSION**

25  
26  
27 Pandemics usually run ravaging course with unpredictable but significant health, social,  
28 economic and political disruptions (4). The impact is multifaceted, can be difficult to assess  
29 and is an area of active research. While the direct health impact of pandemics can be  
30 catastrophic, the indirect health impact driven by depletion of resources and reduced access to  
31 routine care can lead to further increase in morbidity and mortality (4).  
32  
33  
34  
35  
36  
37  
38

39  
40 The COVID-19 pandemic is rapidly evolving with unprecedented impact on global health  
41 systems. China, and later the United States, Italy and other European countries became hotspots  
42 for the virus after reporting their first cases in December 2019 and January 2020 respectively  
43 (2,5,6). Travellers from these regions brought in the disease to Africa, including Nigeria in  
44 February 2020 (7,8) with a rapid expansion in the number of cases in sub-Saharan Africa (9).  
45  
46  
47  
48  
49 The World Health Organization formally declared COVID-19 outbreak a pandemic on 11th  
50  
51 March with 634 813 total confirmed cases as at 29th March, 2020 (10,11). This has sparked  
52  
53  
54  
55  
56  
57  
58  
59  
60 various adaptations in healthcare responses and management, with unpredictable outcomes  
heightened by depletion of resources. For example, the only paediatric surgery care facility in

1  
2  
3 Liberia run by Médecins Sans Frontières (MSF) has been temporarily suspended due to travel  
4  
5 restrictions (12).  
6  
7

8 Children are known to be more susceptible to viral respiratory diseases but ironically, statistics  
9  
10 on COVID-19 have shown low incidence in this age group. An analysis of 72 314 cases of  
11  
12 COVID-19 from the Chinese Centre for Disease Control and Prevention showed a low  
13  
14 incidence in children with those younger than 10 years accounting for only 1% of cases (13).  
15  
16 Haiyan Qiu and colleagues in an observational cohort study of 36 children with COVID-19 in  
17  
18 *The Lancet Infectious Diseases* found that all the patients had mild (47%) or moderate (53%)  
19  
20 type of COVID-19 with large proportion (28%) being asymptomatic (14). This clinical pattern  
21  
22 of COVID-19 in the paediatric population could make children important facilitators of viral  
23  
24 transmission, and may thus place providers of health care in them at increased risk of infection  
25  
26 (14–16).  
27  
28  
29  
30  
31

32 Our survey showed that majority of the paediatric surgeons have stopped operating on all  
33  
34 elective conditions in both public and private tertiary health institutions to minimise contact  
35  
36 with potential carriers of the virus and conserve resources. This is consistent with the American  
37  
38 College of Surgeons COVID 19: Elective Case Triage Guidelines for Surgical Care which  
39  
40 recommended that surgery should be performed only if delaying the procedure is likely to  
41  
42 prolong hospital stay, increase the likelihood of later hospital admission or cause harm to the  
43  
44 patient (17). A recent article recognises the higher frequency of highly symptomatic patients  
45  
46 on the elective operation list in LMICs compared to HICs but still advocates that truly elective  
47  
48 operations should be postponed to preserve PPE, staff and facility capacity as important  
49  
50 resources during a surge response (18).  
51  
52  
53  
54  
55

56 The ACS advocates that “children who have failed attempts at medical management of a  
57  
58 surgical condition should be considered for surgery” (17). Our study revealed an increased  
59  
60

1  
2  
3 uptake of non-operative management of some surgical conditions such as intussusception,  
4 uncomplicated appendicitis and some cases of trauma by 2%, 10% and 6% respectively. This  
5  
6 modality of care was probably adopted to reduce exposure to surgery during the pandemic as  
7  
8 9(18%) centres have newly adopted this approach. Outcome of these modifications in  
9  
10 management protocol may be subject to future research.  
11  
12  
13

14  
15 Some suspended elective cases had presented as emergencies as reported in 11(22%) centres.  
16  
17 They included incarcerated inguinoscrotal hernias (10), sub-acute appendicitis (2) and  
18  
19 previously decompressing anovestibular fistula that developed partial obstruction (1). This is  
20  
21 an indirect impact of the pandemic due to reduced access to routine care in these patients.  
22  
23 Official tele-medicine platforms for follow up care of patients may aid early detection of  
24  
25 complications or other needs for hospital visits while elective surgeries remain suspended,  
26  
27 outpatient clinics locked down and patients are being given long appointments. Only 10(20%)  
28  
29 centers in our survey have an official tele-medicine platform for follow up care of patients  
30  
31 especially during this period of covid-19 pandemic. The ACS recommends that tele-medicine  
32  
33 and tele-consult services should be used for patient and physician interaction when available  
34  
35 (19).  
36  
37  
38  
39  
40

41  
42 In this report, all centres continued to operate on emergencies and there was consistent monthly  
43  
44 average number of surgeries from November 2019 to February 2020 but a sharp decline in  
45  
46 March 2020. This corresponded with the period of social and economic disruptions which  
47  
48 followed the first confirmed case of COVID-19 in Nigeria reported on 27th February 2020  
49  
50 (8,20).  
51  
52

53  
54 Majority of centres (84%) had designated isolation wards, but only 4% of them had children  
55  
56 with the virus and none had managed a COVID-19 positive child with surgical condition.  
57  
58 Although local statistics of incidence in children was not available in our literature search, our  
59  
60



1  
2  
3 finding is suggestive of a low incidence of confirmed COVID-19 in children in Nigeria which  
4 is consistent with global data (13,21). Despite this low incidence in children, about half of  
5  
6 paediatric surgeons in our survey feel unsafe operating on patients during this period and more  
7  
8 are unwilling to operate on confirmed COVID-19 patients. Willingness to operate on patients  
9  
10 during this period negatively correlated with advanced years of experience, availability of  
11  
12 adequate PPE, good rating of institutions' infrastructural adequacy for coping with the  
13  
14 pandemic and training on COVID-19 preparedness and care. A systematic review and meta-  
15  
16 analyses of healthcare workers' willingness to work during an influenza pandemic showed  
17  
18 statistically significant association between increased willingness to work and perceived  
19  
20 personal safety, awareness of pandemic risk and clinical knowledge of influenza pandemics,  
21  
22 role-specific knowledge, pandemic response training, and confidence in personal skills (22).  
23  
24 The reason for this disparity with our study may be partly due to increased susceptibility of  
25  
26 older persons to COVID-19 but further research may clarify this finding.  
27  
28  
29  
30  
31  
32

33 Majority of centres (58%) had suspended academic training during this pandemic while 26%  
34 engaged "WhatsApp" chat rooms. Only 6% made use of Video-conferencing. Poor internet  
35  
36 connectivity and high cost of subscription in sub-Saharan Africa may be partly responsible for  
37  
38 this poor uptake of video communication (23,24). Online chat rooms are generally accessible  
39  
40 and may be explored as viable media alternative.  
41  
42  
43  
44  
45

46 This research is survey based with attendant limitation of recall. The study however does  
47  
48 provide information on early impact of COVID-19 pandemic on paediatric surgery in Nigeria  
49  
50 to help in beginning to plan towards restarting services and handling future unprecedented  
51  
52 situations.  
53  
54  
55  
56  
57  
58  
59  
60

## CONCLUSION

The COVID-19 pandemic has resulted in cessation of elective surgeries and a sharp decline in the number of emergency surgeries performed on children in Nigeria. Significant number of pediatric surgeons do not feel safe operating on patients and are mostly unwilling to operate on COVID-19 positive patients in the initial stages of the pandemic. Measures to improve their safety and electronic communication with patients and professional colleagues during the pandemic may help improve the surgical care of children. A follow up study is planned to identify further impacts of the pandemic on children's surgical care.

## References

1. Lai CC, Shih TP, Ko WC, et al (2020) Severe acute respiratory syndrome coronavirus 2 (SARS-CoV-2) and coronavirus disease-2019 (COVID-19): The epidemic and the challenges. *Int J Antimicrob Agents* [Internet]. 55(3):105924. Available from: <https://doi.org/10.1016/j.ijantimicag.2020.105924>
2. Shereen MA, Khan S, Kazmi A, et al (2020) COVID-19 infection: Origin, transmission, and characteristics of human coronaviruses. *J Adv Res* [Internet]. 24:91–8. Available from: <https://doi.org/10.1016/j.jare.2020.03.005>
3. U.S. Department of Health and Human Services. Pandemic Influenza Plan. 2017 Update [Internet]
4. Pandemics: Risks, Impacts, and Mitigation - Disease Control Priorities: Improving Health and Reducing Poverty - NCBI Bookshelf [Internet]. Available from: <https://www.ncbi.nlm.nih.gov/books/NBK525302/>
5. Wang C, Horby PW, Hayden FG, et al (2020) A novel coronavirus outbreak of global health concern. *Lancet* 395(10223):470–3
6. Chiara Severgnini e Redazione Online. Coronavirus, primi due casi in Italia: sono due turisti cinesi - Corriere.it [Internet]. Available from: [https://www.corriere.it/cronache/20\\_gennaio\\_30/coronavirus-italia-corona-9d6dc436-4343-11ea-bdc8-faf1f56f19b7.shtml?refresh\\_ce-cp](https://www.corriere.it/cronache/20_gennaio_30/coronavirus-italia-corona-9d6dc436-4343-11ea-bdc8-faf1f56f19b7.shtml?refresh_ce-cp)
7. World Health Organization. COVID-19 cases top 10 000 in Africa \_ WHO \_ Regional Office for Africa. [Internet]
8. Adepoju P (2020) Nigeria responds to COVID-19; first case detected in sub-Saharan Africa. *Nature medicine* 26:444-448 [Internet]. Available from: <http://www.embase.com/search/results?subaction=viewrecord&from=export&id=L631242957%0Ahttp://dx.doi.org/10.1038/d41591-020-00004-2>
9. Martinez-Alvarez M, Jarde A, Usuf E, et al (2020) COVID-19 pandemic in West Africa. *Lancet Glob Heal* [Internet] 2019(20):2019–20. Available from: [http://dx.doi.org/10.1016/S2214-109X\(20\)30123-6](http://dx.doi.org/10.1016/S2214-109X(20)30123-6)
10. World Health Organization. WHO Director-General’s opening remarks at the media briefing on COVID-19. 11 March 2020 [Internet]. WHO Director General’s speeches.

2020. p. 4. Available from: <https://www.who.int/dg/speeches/detail/who-director-general-s-opening-remarks-at-the-media-briefing-on-covid-19---11-march-2020>
11. World Health Organization. Mariana N (2020) Coronavirus disease 2019 (COVID-19) situation report 69 [Internet]. 2019(3)
  12. COVID-19 Interrupts the Only Pediatric Surgery Care in Liberia \_ Doctors Without Borders - USA.
  13. Zunyou W, Jennifer M (2020) Characteristics of and Important Lessons From the Coronavirus Disease 2019 (COVID-19) Outbreak in China: Summary of a Report of 72 314 Cases From the Chinese Centre for Disease Control and Prevention 323(13)
  14. Qiu H, Wu J, Hong L, et al (2020) Clinical and epidemiological features of 36 children with coronavirus disease 2019 (COVID-19) in Zhejiang, China: an observational cohort study. *Lancet Infect Dis* [Internet] 2019(20):1–8. Available from: [http://dx.doi.org/10.1016/S1473-3099\(20\)30198-5](http://dx.doi.org/10.1016/S1473-3099(20)30198-5)
  15. Kelvin AA, Halperin S (2020) COVID-19 in children : the link in the transmission chain. *Lancet Infect Dis* [Internet] 2(20):2019–20. Available from: [http://dx.doi.org/10.1016/S1473-3099\(20\)30236-X](http://dx.doi.org/10.1016/S1473-3099(20)30236-X)
  16. Fretheim A (2020) The role of children in the transmission of SARS-CoV-2 (COVID-19) – a rapid review [Barns rolle i spredning av SARS-CoV-19 (Covid-19) – en hurtigoversikt] Rapid review, 2020(3): 7-9. Oslo: Folkehelseinstituttet/ Norwegian Institute of Public Health, 2020
  17. American College of Surgeons (2020) COVID 19 : Elective Case Triage Guidelines for Surgical Care. *Am Coll Surg*. [Internet] 24(3):2020.
  18. Weiser TG, Ademuyiwa AO, Capo-chichi N et al (2020) COVID-19 preparedness within the surgical, obstetric and anesthetic ecosystem in Sub Saharan Africa. *Ann Surg* [Internet]
  19. American College of Surgeons. COVID-19 Guidelines for Triage of Pediatric Patients [Internet]. Available from: <https://www.facs.org/covid-19/clinical-guidance/elective-case/pediatric-surgery>
  20. Ehanire O (2020) First case of Coronavirus disease (Covid-19) confirmed in Nigeria. Nigeria Centre for Disease Control. February 28, 2020 [Internet]

- 1  
2  
3  
4  
5  
6  
7  
8  
9  
10  
11  
12  
13  
14  
15  
16  
17  
18  
19  
20  
21  
22  
23  
24  
25  
26  
27  
28  
29  
30  
31  
32  
33  
34  
35  
36  
37  
38  
39  
40  
41  
42  
43  
44  
45  
46  
47  
48  
49  
50  
51  
52  
53  
54  
55  
56  
57  
58  
59  
60
21. She J, Liu L, Liu W (2020) COVID - 19 epidemic : Disease characteristics in children. *J Med Virol.* 2020(3);1–8. <https://doi.org/10.1002/jmv.25807>
  22. Aoyagi Y, Beck CR, Dingwall R, et al (2015) Healthcare workers’ willingness to work during an influenza pandemic: A systematic review and meta-analysis. *Influenza and other Respiratory Viruses.* 9: 120-30
  23. Akue-Kpakpo A (2013) Study on international Internet connectivity in sub-Saharan Africa. International Telecommunication Union Telecommunication Development Bureau Place des Nations CH-1211 Geneva 20 Switzerland [www.itu.int](http://www.itu.int) [Internet] 2013(3)
  24. Concerns over high cost of Internet connection – Punch Newspaper [Internet]. November 4, 2018: 26-7

**FIGURES**

**Figure 1: Cluster bar chart of the mean number of surgeries over 5 months**

**Figure 2: Protocols adopted by centres for urgent cases**

**Figure 3: Perception of safety of paediatric surgeons and willingness to operate**

**Figure 4: Perception of adequacy of PPE for theatre staff now and in 3 months**

**Figure 5: Ratings of how institutions are coping with COVID-19 pandemic**

**Figure 6: Impact of COVID-19 on academic training**

1  
2  
3  
4  
5  
6  
7  
8  
9  
10  
11  
12  
13  
14  
15  
16  
17  
18  
19  
20  
21  
22  
23  
24  
25  
26  
27  
28  
29  
30  
31  
32  
33  
34  
35  
36  
37  
38  
39  
40  
41  
42  
43  
44  
45  
46  
47  
48  
49  
50  
51  
52  
53  
54  
55  
56  
57  
58  
59  
60

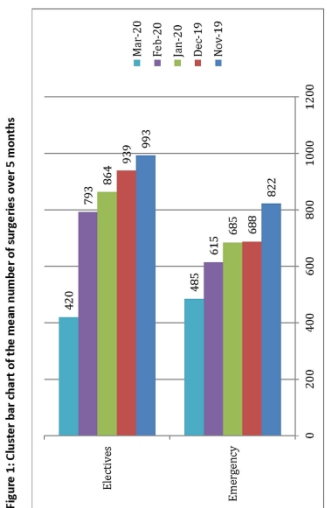

Figure 1: Cluster bar chart of the mean number of surgeries over 5 months

Created by Universal Document Converter

Created by Universal Document Converter

296x209mm (300 x 300 DPI)

1  
2  
3  
4  
5  
6  
7  
8  
9  
10  
11  
12  
13  
14  
15  
16  
17  
18  
19  
20  
21  
22  
23  
24  
25  
26  
27  
28  
29  
30  
31  
32  
33  
34  
35  
36  
37  
38  
39  
40  
41  
42  
43  
44  
45  
46  
47  
48  
49  
50  
51  
52  
53  
54  
55  
56  
57  
58  
59  
60

Figure 2. Protocols adopted by centres for urgent cases

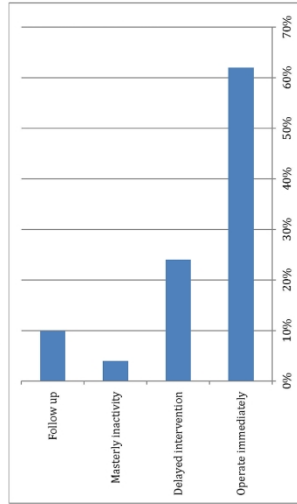

Created by Universal Document Converter

Created by Universal Document Converter

296x209mm (300 x 300 DPI)



1  
2  
3  
4  
5  
6  
7  
8  
9  
10  
11  
12  
13  
14  
15  
16  
17  
18  
19  
20  
21  
22  
23  
24  
25  
26  
27  
28  
29  
30  
31  
32  
33  
34  
35  
36  
37  
38  
39  
40  
41  
42  
43  
44  
45  
46  
47  
48  
49  
50  
51  
52  
53  
54  
55  
56  
57  
58  
59  
60

Figure 3: Perception of safety of paediatric surgeons and willingness to operate

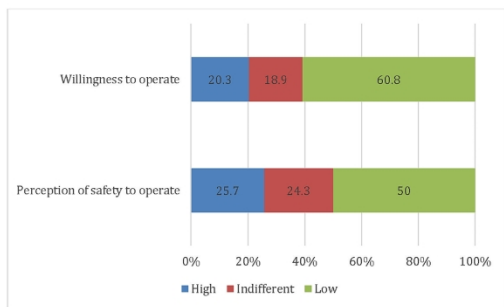

Created by Universal Document Converter

Created by Universal Document Converter

209x296mm (300 x 300 DPI)

1  
2  
3  
4  
5  
6  
7  
8  
9  
10  
11  
12  
13  
14  
15  
16  
17  
18  
19  
20  
21  
22  
23  
24  
25  
26  
27  
28  
29  
30  
31  
32  
33  
34  
35  
36  
37  
38  
39  
40  
41  
42  
43  
44  
45  
46  
47  
48  
49  
50  
51  
52  
53  
54  
55  
56  
57  
58  
59  
60

Figure 4. Perception of adequacy of PPE for theatre staff now and in 3 months

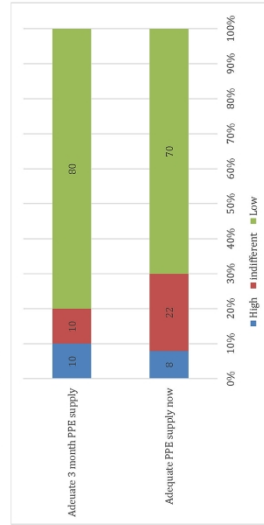

Created by Universal Document Converter

Created by Universal Document Converter

296x209mm (300 x 300 DPI)

1  
2  
3  
4  
5  
6  
7  
8  
9  
10  
11  
12  
13  
14  
15  
16  
17  
18  
19  
20  
21  
22  
23  
24  
25  
26  
27  
28  
29  
30  
31  
32  
33  
34  
35  
36  
37  
38  
39  
40  
41  
42  
43  
44  
45  
46  
47  
48  
49  
50  
51  
52  
53  
54  
55  
56  
57  
58  
59  
60

Figure 5: Ratings of how institutions are coping with COVID-19 pandemic

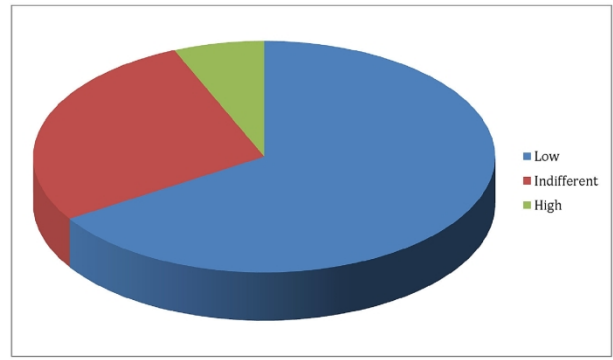

Created by Universal Document Converter

Created by Universal Document Converter

209x296mm (300 x 300 DPI)

1  
2  
3  
4  
5  
6  
7  
8  
9  
10  
11  
12  
13  
14  
15  
16  
17  
18  
19  
20  
21  
22  
23  
24  
25  
26  
27  
28  
29  
30  
31  
32  
33  
34  
35  
36  
37  
38  
39  
40  
41  
42  
43  
44  
45  
46  
47  
48  
49  
50  
51  
52  
53  
54  
55  
56  
57  
58  
59  
60

Figure 6. Impact of COVID-19 on academic training

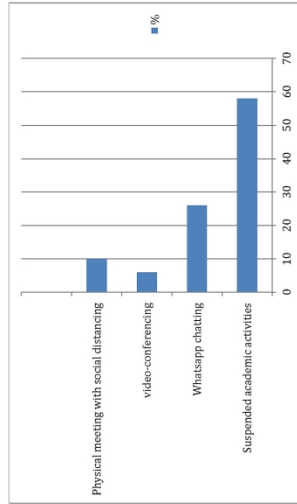

Created by Universal Document Converter

Created by Universal Document Converter

296x209mm (300 x 300 DPI)

# BMJ Paediatrics Open

## Early Impact of COVID-19 Pandemic on Paediatric Surgical Practice in Nigeria: a National Survey of Paediatric Surgeons.

|                               |                                                                                                                                                                                                                                                                              |
|-------------------------------|------------------------------------------------------------------------------------------------------------------------------------------------------------------------------------------------------------------------------------------------------------------------------|
| Journal:                      | <i>BMJ Paediatrics Open</i>                                                                                                                                                                                                                                                  |
| Manuscript ID                 | bmjpo-2020-000732.R1                                                                                                                                                                                                                                                         |
| Article Type:                 | Original research                                                                                                                                                                                                                                                            |
| Date Submitted by the Author: | 21-May-2020                                                                                                                                                                                                                                                                  |
| Complete List of Authors:     | Ogundele, Ibukunolu; Olabisi Onabanjo University Teaching Hospital, Surgery<br>Alakaloko, Felix; Lagos University Teaching Hospital, Surgery<br>Nwokoro, Collins; Olabisi Onabanjo University Teaching Hospital, Surgery<br>Ameh, Emmanuel; National Hospital Abuja, Surgery |
| Keywords:                     | Health services research                                                                                                                                                                                                                                                     |
|                               |                                                                                                                                                                                                                                                                              |

SCHOLARONE™  
Manuscripts

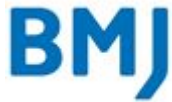

I, the Submitting Author has the right to grant and does grant on behalf of all authors of the Work (as defined in the below author licence), an exclusive licence and/or a non-exclusive licence for contributions from authors who are: i) UK Crown employees; ii) where BMJ has agreed a CC-BY licence shall apply, and/or iii) in accordance with the terms applicable for US Federal Government officers or employees acting as part of their official duties; on a worldwide, perpetual, irrevocable, royalty-free basis to BMJ Publishing Group Ltd ("BMJ") its licensees and where the relevant Journal is co-owned by BMJ to the co-owners of the Journal, to publish the Work in this journal and any other BMJ products and to exploit all rights, as set out in our [licence](#).

The Submitting Author accepts and understands that any supply made under these terms is made by BMJ to the Submitting Author unless you are acting as an employee on behalf of your employer or a postgraduate student of an affiliated institution which is paying any applicable article publishing charge ("APC") for Open Access articles. Where the Submitting Author wishes to make the Work available on an Open Access basis (and intends to pay the relevant APC), the terms of reuse of such Open Access shall be governed by a Creative Commons licence – details of these licences and which [Creative Commons](#) licence will apply to this Work are set out in our licence referred to above.

Other than as permitted in any relevant BMJ Author's Self Archiving Policies, I confirm this Work has not been accepted for publication elsewhere, is not being considered for publication elsewhere and does not duplicate material already published. I confirm all authors consent to publication of this Work and authorise the granting of this licence.

**TITLE PAGE****Title:**

**Early Impact of COVID-19 Pandemic on Paediatric Surgical Practice in Nigeria: a National Survey of Paediatric Surgeons.**

**Authors:**

**I.O. Ogundele<sup>1</sup>, F.M. Alakaloko<sup>2</sup>, C.C. Nwokoro<sup>1</sup>, E.A. Ameh<sup>3</sup>.**

<sup>1</sup>Division of Paediatric Surgery, Department of Surgery, Olabisi Onabanjo University Teaching Hospital, Ogun state. Nigeria.

<sup>2</sup>Paediatric Surgery Unit, Department of Surgery, Lagos University Teaching Hospital, Lagos State. Nigeria.

<sup>3</sup>Division of Paediatric Surgery, Department of Surgery, National Hospital, Abuja FCT. Nigeria.

**Corresponding Author:**

Ibukunolu O. Ogundele

Department of Surgery, Olabisi Onabanjo University Teaching Hospital, PMB 2001, Sagamu, Ogun State, Nigeria.

E-mail address: [ogundeleibk@gmail.com](mailto:ogundeleibk@gmail.com)

Telephone: +234 802 532 0480

**Competing Interests:** All authors declare no conflicts of interest.

**Funding:** This research received no specific grant from any funding agency in the public, commercial or not-for-profit sectors.

**Contributorship:** IOO and FMA conceived the research idea. IOO, FMA and CCN conducted the survey. IOO, FMA and EAA made the drafts of the manuscript. All the authors made substantive contributions to the intellectual content and reporting of the work described in this article. They all read and approved the final manuscript. IOO and FMA are responsible for the overall content as guarantors.

**Ethics Approval:** Health Research Ethics Committee of Olabisi Onabanjo University Teaching Hospital, Sagamu, Ogun State, Nigeria. OOUTH/HREC/339/2020AP.

**Word Count:** 1 967.

## ABSTRACT

**Introduction** The novel Coronavirus disease has had significant impact on healthcare globally. Knowledge of this virus is evolving, definitive care is not yet known, and mortality is increasing. We assessed its initial impact on paediatric surgical practice in Nigeria, creating a benchmark for recommendations and future reference.

**Methods** Survey of 120 paediatric surgeons from 50 centres to assess socio-demographics and specific domains of impact of COVID-19 on their services and training in Nigeria. Seventy four surgeons adequately responded. Responses have been analysed. Duplicate submissions for centres were excluded by combining and averaging the responses from centres with multiple respondents.

**Results** Forty-six (92%) centres had suspended elective surgeries. All centres continued emergency surgeries but volume reduced in March by 31%. Eleven (22%) centres reported 13 suspended elective cases presenting as emergencies in March, accounting for 3% of total emergency surgeries. Nine (18%) centres adopted new modalities for managing selected surgical conditions: non-operative reduction of intussusception in 1(2%), antibiotic management of uncomplicated acute appendicitis in 5(10%), more conservative management of trauma and replacement of laparoscopic appendectomy with open surgery in 3(6%) respectively. Low perception of adequacy of Personal Protective Equipment (PPE) was reported in 35(70%) centres. Forty (80%) centres did not offer telemedicine for patients follow up. Twenty-nine (58%) centres had suspended academic training. Perception of safety to operate was low in 37(50%) respondents, indifferent in 24% and high in 26%.

**Conclusion** Majority of paediatric surgical centres reported cessation of elective surgeries whilst continuing emergencies. There is however an acute decline in the volume of emergency surgeries. Adequate PPE need to be provided and preparations towards handling backlog of



1  
2  
3 elective surgeries once the pandemic recedes. Further study is planned to more conclusively  
4  
5 understand the full impact of this pandemic on children's surgery.  
6  
7  
8  
9  
10

11 **Key words:** pandemic, COVID-19, children's surgery.  
12  
13  
14  
15  
16  
17  
18  
19  
20  
21  
22  
23  
24  
25  
26  
27  
28  
29  
30  
31  
32  
33  
34  
35  
36  
37  
38  
39  
40  
41  
42  
43  
44  
45  
46  
47  
48  
49  
50  
51  
52  
53  
54  
55  
56  
57  
58  
59  
60

Confidential: For Review Only

### What is already known and what this study adds

Anecdotal evidence suggests that elective surgeries in children have been suspended due to COVID-19 pandemic.

Our study shows that most centres have suspended elective surgeries. All centres continued emergency surgeries but the volume reduced by 31% in March 2020. Moreover, 3% of the emergency surgeries were some of the suspended elective cases presenting as emergencies.

Almost 20% of centres have newly adopted non-operative modalities for managing selected emergency surgical conditions.

This data shows an urgent need for consensus guidelines for emergency services and protocols for handling backlog of elective surgeries in children once the pandemic recedes.

Outcome of the modifications in treatment may be subject to future research.

## BACKGROUND

Corona virus disease 19 (COVID-19) is a highly transmissible novel viral illness, caused by severe acute respiratory syndrome coronavirus 2 (SARS-CoV-2) (1). It was reported to have emerged in Wuhan, China, in December 2019 but later spread to other parts of China and other countries of the world (2). This disease poses a huge challenge to health care systems around the world. The U.S. Department of Health and Human Services stated in its 2017 Pandemic Influenza plan update that “emerging viral pandemics can place extraordinary and sustained demands on public health and health systems and on providers of essential community services” (3). The effect may be more profound in regions with already limited resources and fragile health infrastructure. The aim of this study was to carry out a survey of paediatric surgeons in a resource limited setting to assess early effects of the COVID-19 pandemic on their practice in the initial stages of the outbreak. Data obtained would be used for recommendations and future reference.

## METHODS

Relevant information was obtained from paediatric surgeons (consultants and senior registrars) currently practising in Nigeria, using a pre-tested questionnaire designed on Microsoft Word version 10 (Microsoft Seattle, WA, USA) and transcribed to google form. The questions were based on 5-point Likert scale (Strongly agree, agree, neither agree nor disagree, disagree, strongly disagree). We circulated the forms to the predetermined group of specialists by email and online chat rooms and kept them open from 10th to 17th April 2020. Daily reminders were also sent.

1  
2  
3 Participants were required to provide socio-demographic data, information on patient traffic  
4 and decision on management of specific conditions, availability of PPE, impact on surgeon's  
5  
6  
7  
8  
9  
10  
11  
12  
13  
14  
15  
16  
17  
18  
19  
20  
21  
22  
23  
24  
25  
26  
27  
28  
29  
30  
31  
32  
33  
34  
35  
36  
37  
38  
39  
40  
41  
42  
43  
44  
45  
46  
47  
48  
49  
50  
51  
52  
53  
54  
55  
56  
57  
58  
59  
60

Participants were required to provide socio-demographic data, information on patient traffic and decision on management of specific conditions, availability of PPE, impact on surgeon's psyche, their academic programs and institutions infrastructure.

A total of 120 paediatric surgeons were sent the survey. Eighty-three paediatric surgeons responded but 74 were adequately completed. For the purpose of analysis, the 5-point Likert scale was reduced to 3 points (Agree, neutral, disagree).

Duplicate submissions for centres were excluded by combining and averaging the responses from centres with multiple responses.

Responses were analysed using SPSS version 22 and presented as categorical data and percentages.

**Patient and Public Involvement statement:** This research was done without patient involvement. Patients were not invited to comment on the study design and were not consulted to develop patient relevant outcomes or interpret the results. Patients were not invited to contribute to the writing or editing of this document for readability or accuracy.

**Ethics Approval:** Obtained from the Health Research Ethics Committee of Olabisi Onabanjo University Teaching Hospital, Sagamu, Ogun State, Nigeria (OOUTH/HREC/339/2020AP).

## RESULTS

### Demographics

The response rate was 74(61%). The 74 completed responses represented 50 centres across the country. Table 1 shows the socio-demographic characteristics of respondents.

**Table: 1** Socio-demographic characteristics of respondents

| Characteristics of respondents | Scores | Percentage |
|--------------------------------|--------|------------|
| 1.Cadre                        | N=74   |            |
| Consultant                     | 45     | 61         |
| Senior-Registrar               | 29     | 39         |
| 2.Gender                       | N=74   |            |
| Male                           | 62     | 84         |
| Female                         | 12     | 16         |
| 3.Work place                   | N=50   |            |
| Public                         | 48     | 96         |
| Private                        | 2      | 4          |
| 4.Type of Health facility      | N=50   |            |
| Teaching hospital              | 39     | 78         |
| Federal Medical Centre         | 10     | 20         |
| General/Specialist Hospital    | 1      | 2          |

### Impact on Surgeries

Elective surgeries had been suspended in 46(92%) centres at the time of this survey. There was a steady decline in the average number of elective surgeries done over 5 months between November 2019 with 993(25% of 5 month total) and March 2020 with 420(10% of total) cases. Similar trend was observed with emergency surgeries which reduced from 822(25% of 5 month total) in November 2019 to 485(15% of total) in March 2020. Comparatively, there were more elective than emergency surgeries per month until March (Figure 1).

1  
2  
3 Twenty (40%) centres suspended their elective surgeries less than 2 weeks prior to the survey  
4  
5 in April, 26(52%) centres stopped a month earlier and 4(8%) had suspended their elective list  
6  
7 for over a month.  
8  
9

### 10 **Adverse clinical outcomes**

11  
12  
13 Eleven (22%) centres reported at least one of the elective cases suspended due to COVID-19  
14  
15 pandemic presenting as emergency in March. There were 13 of such patients accounting for an  
16  
17 estimated 3% of the total emergency surgeries for the month. They included inguinoscrotal  
18  
19 hernias (10) with obstruction, sub-acute appendicitis (2) and previously decompressing  
20  
21 anovestibular fistula with intestinal obstruction (1).  
22  
23  
24  
25

### 26 **Changes in Management Modality**

27  
28  
29 Nine (18%) centres have newly adopted non-operative modalities for managing selected  
30  
31 surgical conditions in response to the pandemic. One (2%) centre adopted non-operative  
32  
33 reduction of intussusception while 5(10%) centres adopted management of uncomplicated  
34  
35 acute appendicitis with antibiotics and 3(6%) took a more conservative approach to  
36  
37 management of trauma. Three (6%) centres replaced laparoscopic appendectomy with open  
38  
39 surgery.  
40  
41  
42

43  
44 Protocol for the management of urgent cases such as cancers, symptomatic hernias in the early  
45  
46 period of COVID-19 was to continue to immediately operate in 31(62%) centres, delayed  
47  
48 intervention in 12(24%), masterly inactivity in 2(4%) and follow up in 5(10%).  
49  
50

### 51 **Impact on Surgeons**

52  
53  
54 Paediatric surgeons' perception of safety to operate during the pandemic and their willingness  
55  
56 to operate on COVID-19 positive patients are shown in figure 2. Perception of safety to operate  
57  
58  
59  
60

1  
2  
3 rated low in half of respondents. No member of the surgical teams had tested positive for  
4  
5 COVID-19.  
6  
7

8  
9 Fifty-seven (77%) agreed to a need for paediatric surgeons to have additional training in  
10  
11 management of surgical patients during epidemics, 6(8%) were neutral, while 11(15%)  
12  
13 disagreed. Those willing to attend such training were 47(64%), 15(20%) were neutral and  
14  
15 12(16%) were unwilling.  
16  
17

### 18 **Impact on Institutions, Supplies and Outpatient Clinics**

19  
20  
21 Forty-two (84%) centres had designated isolation wards but only 2(4%) had COVID-19  
22  
23 positive children on admission and none had managed COVID-19 positive children with  
24  
25 surgical condition in their facility at the time of this survey. Majority of centres had low  
26  
27 perception of adequacy of PPE for theatre staff both at the time of survey and at 3 months  
28  
29 afterwards as depicted in Figure 3. Ratings of how institutions are coping with the COVID-19  
30  
31 pandemic was low in 33(66%), intermediate in 14(28%) and high in 3(6%) centres. Forty  
32  
33 (80%) centres do not offer hospital powered telemedicine services for patients follow up  
34  
35 despite lockdown on outpatient clinics.  
36  
37  
38  
39

### 40 **Impact on Academic Training Programs**

41  
42  
43 Twenty-nine (58%) centres had suspended academic training during the pandemic, 13(26%)  
44  
45 engaged “WhatsApp” chat rooms, while 3(6%) made use of Video-conferencing and 5(10%)  
46  
47 still carried out their academic training through physical meetings but with social distancing.  
48  
49  
50  
51  
52  
53

## 54 **DISCUSSION**

55  
56  
57 Pandemics usually run ravaging course with unpredictable health, social and economic  
58  
59 disruptions (4). The impact can be difficult to assess and is an area of active research. While  
60

1  
2  
3 the direct health impact of pandemics can be catastrophic, the indirect impact driven by  
4 depletion of resources and reduced access to routine care can lead to further increase in  
5 morbidity and mortality (4).  
6  
7  
8  
9

10 COVID-19 pandemic is rapidly evolving with unprecedented impact on global health systems.  
11 China, and later the United States, Italy and other European countries became hotspots for the  
12 virus after reporting their first cases in December 2019 and January 2020 respectively (2,5,6).  
13 Travellers from these regions brought in the disease to Africa, including Nigeria in February  
14 2020 (7,8) with a rapid expansion in the number of cases in sub-Saharan Africa (9). The World  
15 Health Organization formally declared COVID-19 outbreak a pandemic on 11th March with  
16 634 813 total confirmed cases as at 29th March, 2020 (10,11). This has sparked various  
17 adaptations in healthcare responses and management, with unpredictable outcomes heightened  
18 by depletion of resources. For example, the only paediatric surgery care facility in Liberia run  
19 by Médecins Sans Frontières (MSF) has been temporarily suspended due to travel restrictions  
20 (12).  
21  
22  
23  
24  
25  
26  
27  
28  
29  
30  
31  
32  
33  
34  
35  
36

37 Children are more susceptible to viral respiratory diseases but ironically, statistics on COVID-  
38 19 have shown low incidence in this age group. An analysis of 72 314 cases of COVID-19  
39 from the Chinese Centre for Disease Control and Prevention showed a low incidence in  
40 children with those younger than 10 years accounting for only 1% of cases (13). A recent  
41 observational cohort study of 36 children with COVID-19 found that all the patients had mild  
42 (47%) or moderate (53%) type of COVID-19 with large proportion (28%) being asymptomatic  
43 (14). This clinical pattern of COVID-19 in the paediatric population could make children  
44 important facilitators of viral transmission, and may thus place providers of health care in them  
45 at increased risk of infection (14–16).  
46  
47  
48  
49  
50  
51  
52  
53  
54  
55  
56  
57  
58  
59  
60



1  
2  
3 Our survey showed that majority of the paediatric surgeons have stopped operating on all  
4 elective conditions in both public and private tertiary health institutions to minimise contact  
5  
6 with potential carriers of the virus and conserve resources. This is consistent with the American  
7  
8 College of Surgeons COVID 19: Elective Case Triage Guidelines for Surgical Care which  
9  
10 recommended that surgery should be performed only if delaying the procedure is likely to  
11  
12 prolong hospital stay, increase the likelihood of later hospital admission or cause harm to the  
13  
14 patient (17). A recent article recognises the higher frequency of highly symptomatic patients  
15  
16 on the elective operation list in LMICs compared to HICs but still advocates that truly elective  
17  
18 operations should be postponed to preserve PPE, staff and facility capacity as important  
19  
20 resources during a surge response (18).  
21  
22  
23  
24  
25

26  
27 The ACS advocates that “children who have failed attempts at medical management of a  
28  
29 surgical condition should be considered for surgery” (17). Our study revealed an increased  
30  
31 uptake of non-operative management of some surgical conditions such as intussusception,  
32  
33 uncomplicated appendicitis and some cases of trauma. This modality of care was probably  
34  
35 adopted to reduce exposure to surgery during the pandemic. Outcome of these modifications  
36  
37 in management protocol may be subject to future research.  
38  
39  
40

41  
42 Some suspended elective cases had presented as emergencies. They included incarcerated  
43  
44 inguinoscrotal hernias, sub-acute appendicitis and previously decompressing anovestibular  
45  
46 fistula that developed partial obstruction. This is an indirect impact of the pandemic due to  
47  
48 reduced access to routine care in these patients. Official tele-medicine platforms for follow up  
49  
50 care of patients may aid early detection of complications or other needs for hospital visits while  
51  
52 elective surgeries remain suspended, outpatient clinics locked down and patients are being  
53  
54 given long appointments. Few centers in our survey have an official tele-medicine platform for  
55  
56 follow up care of patients especially during this period of covid-19 pandemic. The ACS  
57  
58  
59  
60

1  
2  
3 recommends that tele-medicine and tele-consult services should be used for patient and  
4  
5 physician interaction when available (19).  
6  
7

8  
9 In this report, all centres continued to operate on emergencies and there was consistent monthly  
10  
11 average number of surgeries from November 2019 to February 2020 but a sharp decline in  
12  
13 March 2020. This corresponded with the period of social and economic disruptions which  
14  
15 followed the first confirmed case of COVID-19 in Nigeria reported on 27th February 2020  
16  
17 (8,20).  
18  
19

20  
21 Majority of centres had designated isolation wards, but only 4% of them had children with the  
22  
23 virus and none had managed a COVID-19 positive child with surgical condition. Although  
24  
25 local statistics of incidence in children was not available in our literature search, our finding is  
26  
27 suggestive of a low incidence of confirmed COVID-19 in children in Nigeria which is  
28  
29 consistent with global data (13,21). Despite this low incidence in children, about half of  
30  
31 paediatric surgeons in our survey feel unsafe operating on patients during this period and more  
32  
33 are unwilling to operate on confirmed COVID-19 patients.  
34  
35  
36

37  
38 Majority of centres had suspended academic training during this pandemic. Very few made use  
39  
40 of Video-conferencing. Poor internet connectivity and high cost of subscription in sub-Sahara  
41  
42 Africa may be partly responsible for this poor uptake of video communication (22,23). Online  
43  
44 chat rooms are generally accessible and may be explored as viable media alternative.  
45  
46

47  
48 This research is survey based with attendant limitation of recall. The study however does  
49  
50 provide information on early impact of COVID-19 pandemic on paediatric surgery in Nigeria  
51  
52 to help in beginning to plan towards restarting services and handling future unprecedented  
53  
54 situations.  
55  
56  
57  
58  
59  
60

## CONCLUSION

The COVID-19 pandemic has resulted in cessation of elective surgeries and a sharp decline in the number of emergency surgeries performed on children in Nigeria. Significant number of pediatric surgeons do not feel safe operating on patients and are mostly unwilling to operate on COVID-19 positive patients in the initial stages of the pandemic. Measures to improve their safety and electronic communication with patients and professional colleagues during the pandemic may help improve the surgical care of children. A follow up study is planned to identify further impacts of the pandemic on children's surgical care.

## References

1. Lai CC, Shih TP, Ko WC, et al (2020) Severe acute respiratory syndrome coronavirus 2 (SARS-CoV-2) and coronavirus disease-2019 (COVID-19): The epidemic and the challenges. *Int J Antimicrob Agents* [Internet]. 55(3):105924. Available from: <https://doi.org/10.1016/j.ijantimicag.2020.105924>
2. Shereen MA, Khan S, Kazmi A, et al (2020) COVID-19 infection: Origin, transmission, and characteristics of human coronaviruses. *J Adv Res* [Internet]. 24:91–8. Available from: <https://doi.org/10.1016/j.jare.2020.03.005>
3. U.S. Department of Health and Human Services. Pandemic Influenza Plan. 2017 Update [Internet]
4. Pandemics: Risks, Impacts, and Mitigation - Disease Control Priorities: Improving Health and Reducing Poverty - NCBI Bookshelf [Internet]. Available from: <https://www.ncbi.nlm.nih.gov/books/NBK525302/>
5. Wang C, Horby PW, Hayden FG, et al (2020) A novel coronavirus outbreak of global health concern. *Lancet* 395(10223):470–3
6. Chiara Severgnini e Redazione Online. Coronavirus, primi due casi in Italia: sono due turisti cinesi - Corriere.it [Internet]. Available from: [https://www.corriere.it/cronache/20\\_gennaio\\_30/coronavirus-italia-corona-9d6dc436-4343-11ea-bdc8-faf1f56f19b7.shtml?refresh\\_ce-cp](https://www.corriere.it/cronache/20_gennaio_30/coronavirus-italia-corona-9d6dc436-4343-11ea-bdc8-faf1f56f19b7.shtml?refresh_ce-cp)
7. World Health Organization. COVID-19 cases top 10 000 in Africa \_ WHO \_ Regional Office for Africa. [Internet]
8. Adepoju P (2020) Nigeria responds to COVID-19; first case detected in sub-Saharan Africa. *Nature medicine* 26:444-448 [Internet]. Available from: <http://www.embase.com/search/results?subaction=viewrecord&from=export&id=L631242957%0Ahttp://dx.doi.org/10.1038/d41591-020-00004-2>
9. Martinez-Alvarez M, Jarde A, Usuf E, et al (2020) COVID-19 pandemic in West Africa. *Lancet Glob Heal* [Internet] 2019(20):2019–20. Available from: [http://dx.doi.org/10.1016/S2214-109X\(20\)30123-6](http://dx.doi.org/10.1016/S2214-109X(20)30123-6)
10. World Health Organization. WHO Director-General’s opening remarks at the media briefing on COVID-19. 11 March 2020 [Internet]. WHO Director General’s speeches.

2020. p. 4. Available from: <https://www.who.int/dg/speeches/detail/who-director-general-s-opening-remarks-at-the-media-briefing-on-covid-19---11-march-2020>
11. World Health Organization. Mariana N (2020) Coronavirus disease 2019 (COVID-19) situation report 69 [Internet]. 2019(3)
  12. COVID-19 Interrupts the Only Pediatric Surgery Care in Liberia \_ Doctors Without Borders - USA.
  13. Zunyou W, Jennifer M (2020) Characteristics of and Important Lessons From the Coronavirus Disease 2019 (COVID-19) Outbreak in China: Summary of a Report of 72 314 Cases From the Chinese Centre for Disease Control and Prevention 323(13)
  14. Qiu H, Wu J, Hong L, et al (2020) Clinical and epidemiological features of 36 children with coronavirus disease 2019 (COVID-19) in Zhejiang, China: an observational cohort study. *Lancet Infect Dis* [Internet] 2019(20):1–8. Available from: [http://dx.doi.org/10.1016/S1473-3099\(20\)30198-5](http://dx.doi.org/10.1016/S1473-3099(20)30198-5)
  15. Kelvin AA, Halperin S (2020) COVID-19 in children : the link in the transmission chain. *Lancet Infect Dis* [Internet] 2(20):2019–20. Available from: [http://dx.doi.org/10.1016/S1473-3099\(20\)30236-X](http://dx.doi.org/10.1016/S1473-3099(20)30236-X)
  16. Fretheim A (2020) The role of children in the transmission of SARS-CoV-2 (COVID-19) – a rapid review [Barns rolle i spredning av SARS-CoV-19 (Covid-19) – en hurtigoversikt] Rapid review, 2020(3): 7-9. Oslo: Folkehelseinstituttet/ Norwegian Institute of Public Health, 2020
  17. American College of Surgeons (2020) COVID 19 : Elective Case Triage Guidelines for Surgical Care. *Am Coll Surg*. [Internet] 24(3):2020.
  18. Weiser TG, Ademuyiwa AO, Capo-chichi N et al (2020) COVID-19 preparedness within the surgical, obstetric and anesthetic ecosystem in Sub Saharan Africa. *Ann Surg* [Internet]
  19. American College of Surgeons. COVID-19 Guidelines for Triage of Pediatric Patients [Internet]. Available from: <https://www.facs.org/covid-19/clinical-guidance/elective-case/pediatric-surgery>
  20. Ehanire O (2020) First case of Coronavirus disease (Covid-19) confirmed in Nigeria. Nigeria Centre for Disease Control. February 28, 2020 [Internet]

- 1  
2  
3 21. She J, Liu L, Liu W (2020) COVID - 19 epidemic : Disease characteristics in children.  
4 J Med Virol. 2020(3);1–8. <https://doi.org/10.1002/jmv.25807>  
5  
6  
7 22. Akue-Kpakpo A (2013) Study on international Internet connectivity in sub-Saharan  
8 Africa. International Telecommunication Union Telecommunication Development  
9 Bureau Place des Nations CH-1211 Geneva 20 Switzerland [www.itu.int](http://www.itu.int) [Internet]  
10 2013(3)  
11  
12  
13  
14  
15 23. Concerns over high cost of Internet connection – Punch Newspaper [Internet].  
16 November 4, 2018: 26-7  
17  
18  
19  
20  
21  
22  
23  
24  
25  
26  
27  
28  
29  
30  
31  
32  
33  
34  
35  
36  
37  
38  
39  
40  
41  
42  
43  
44  
45  
46  
47  
48  
49  
50  
51  
52  
53  
54  
55  
56  
57  
58  
59  
60

**FIGURES****Figure 1: Cluster bar chart of the mean number of surgeries over 5 months****Figure 2: Perception of safety of paediatric surgeons and willingness to operate****Figure 3: Perception of adequacy of PPE for theatre staff now and in 3 months**

Confidential: For Review Only

1  
2  
3  
4  
5  
6  
7  
8  
9  
10  
11  
12  
13  
14  
15  
16  
17  
18  
19  
20  
21  
22  
23  
24  
25  
26  
27  
28  
29  
30  
31  
32  
33  
34  
35  
36  
37  
38  
39  
40  
41  
42  
43  
44  
45  
46  
47  
48  
49  
50  
51  
52  
53  
54  
55  
56  
57  
58  
59  
60

Figure 1: Cluster column chart of the mean number of surgeries over 5 months

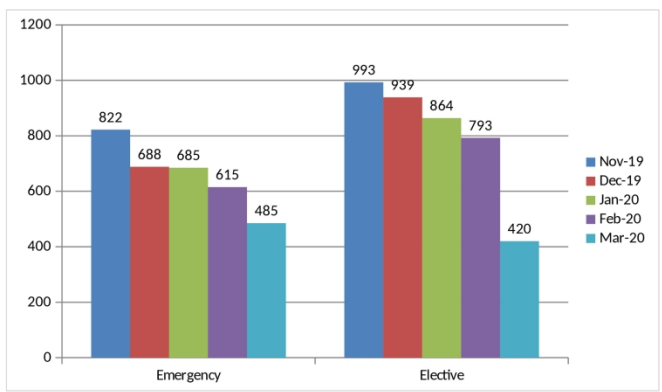

215x279mm (300 x 300 DPI)



1  
2  
3  
4  
5  
6  
7  
8  
9  
10  
11  
12  
13  
14  
15  
16  
17  
18  
19  
20  
21  
22  
23  
24  
25  
26  
27  
28  
29  
30  
31  
32  
33  
34  
35  
36  
37  
38  
39  
40  
41  
42  
43  
44  
45  
46  
47  
48  
49  
50  
51  
52  
53  
54  
55  
56  
57  
58  
59  
60

Figure 2: Perception of safety of paediatric surgeons and willingness to operate

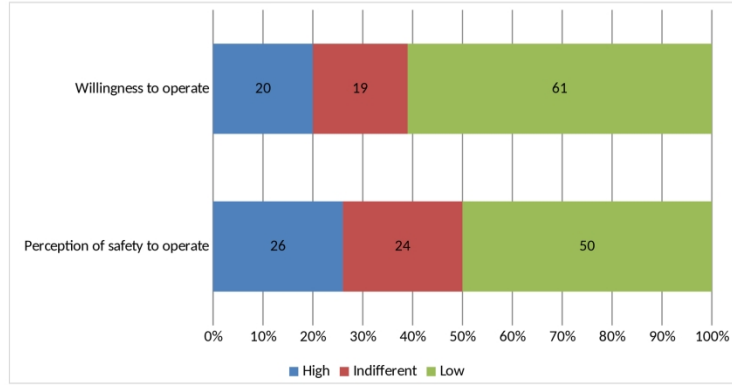

215x279mm (300 x 300 DPI)

1  
2  
3  
4  
5  
6  
7  
8  
9  
10  
11  
12  
13  
14  
15  
16  
17  
18  
19  
20  
21  
22  
23  
24  
25  
26  
27  
28  
29  
30  
31  
32  
33  
34  
35  
36  
37  
38  
39  
40  
41  
42  
43  
44  
45  
46  
47  
48  
49  
50  
51  
52  
53  
54  
55  
56  
57  
58  
59  
60

Figure 3: Perception of adequacy of PPE for theatre staff now and in 3 months

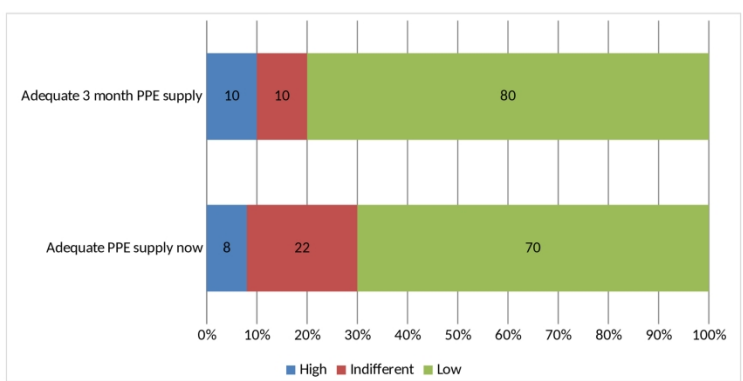

215x279mm (300 x 300 DPI)

## Questionnaire

### Title: Early Impact of Covid-19 Pandemic on Paediatric Surgical Practise in Nigeria: a National Survey of Paediatric Surgeons.

Dear colleague, we are conducting a national survey to assess the “Early Impact of Covid-19 Pandemic on Paediatric Surgical Practise in Nigeria.”

Kindly spare some time to complete this questionnaire. Some of the questions are centre based. All information provided shall be treated with strict confidentiality.

Complete and submit this form only if you consent to information provided being used for the purposes of research.

Thank you.

#### SECTION A. SOCIO-DEMOGRAPHIC DETAILS

1. Gender: Male ( ) Female ( )
2. Age at last birthday (years): .....
3. Cadre: Consultant ( ) Senior Registrar ( )
4. Years of practice of paediatric surgery specialty: .....
5. Location of practice (e.g. Lagos state): .....
6. Current place of work: .....
7. Type of current place of work: Public Hospital ( ) Private Hospital ( )
8. Category of Health Facility:  
Teaching Hospital ( ) Federal Medical Centre ( ) General/specialist Hospital ( )

#### SECTION B. IMPACT ON SURGERIES

1. What is the average number of elective surgeries performed in your centre during the following months?

|               |          |           |           |          |
|---------------|----------|-----------|-----------|----------|
| November 2019 | 1-10 ( ) | 11-20 ( ) | 21-30 ( ) | > 30 ( ) |
| December 2019 | 1-10 ( ) | 11-20 ( ) | 21-30 ( ) | > 30 ( ) |
| January 2020  | 1-10 ( ) | 11-20 ( ) | 21-30 ( ) | > 30 ( ) |
| February 2020 | 1-10 ( ) | 11-20 ( ) | 21-30 ( ) | > 30 ( ) |
| March 2020    | 1-10 ( ) | 11-20 ( ) | 21-30 ( ) | > 30 ( ) |

2. Do you still take elective surgeries in your hospital? Yes ( ) No ( )

If No, how long have you stopped? <1 week ( ) 1-2 weeks ( ) 3-4 weeks ( )  
>4weeks ( )

3. If you have suspended elective surgeries due to COVID-19, have you had any of such cases present as emergency? Yes ( ) No ( )

If yes, kindly list the number of such cases in your centre, the diagnosis and the age of patient(s):

.....  
.....  
.....

4. What is the average number of emergency surgeries performed in your centre during the following months?

|               |          |           |           |          |
|---------------|----------|-----------|-----------|----------|
| November 2019 | 1-10 ( ) | 11-20 ( ) | 21-30 ( ) | > 30 ( ) |
| December 2019 | 1-10 ( ) | 11-20 ( ) | 21-30 ( ) | > 30 ( ) |
| January 2020  | 1-10 ( ) | 11-20 ( ) | 21-30 ( ) | > 30 ( ) |
| February 2020 | 1-10 ( ) | 11-20 ( ) | 21-30 ( ) | > 30 ( ) |
| March 2020    | 1-10 ( ) | 11-20 ( ) | 21-30 ( ) | > 30 ( ) |

5. State your unit protocol for the management of urgent cases such as cancers, symptomatic hernias in this period of COVID-19:

Operate immediately

Delayed intervention

See as follow up

Masterly inactivity

**Please answer some of the following questions using a Likert scale of 1-5**

**(1- Strongly agree, 2- agree, 3- indifferent, 4- disagree and 5- strongly disagree)**

#### SECTION C. IMPACT ON SURGEONS

1. I feel safe operating on patients during the COVID-19 pandemic:

1( ) 2( ) 3( ) 4( ) 5( )

2. I am willing to operate on a confirmed COVID-19 positive patients

1( ) 2( ) 3( ) 4( ) 5( )

3. Has any member of your surgical team tested positive to COVID-19?

Yes ( ) No ( ). If yes, how many? .....

4. Have you had any formal training on COVID-19 care and preparedness?

Yes ( ) No ( )

5. Paediatric surgeons need to have additional training in management of surgical patients during epidemics 1( ) 2( ) 3( ) 4( ) 5( )

6. I am willing to attend such training as in 5 above

1( ) 2( ) 3( ) 4( ) 5( )

#### SECTION D. CHANGES IN MANAGEMENT MODALITY

How has Covid-19 influenced your modality of management of following conditions?

1. Acute appendicitis

A change to conservative management with antibiotics

Operative (Open) as usual

Operative (Laparoscopy) as usual

Operative (Laparoscopy with HME filter and CO2 filter)

Change from Laparoscopic to open surgery

2. Uncomplicated intussusception

Non operative reduction as usual

Operative reduction as usual

Change from operative to non-operative reduction

Change from non-operative to operative reduction

3. Trauma

No change in management modality

Attempt to be more conservative in management

**Please answer some of the following questions using a Likert scale of 1-5**

**(1- Strongly agree, 2- agree, 3- indifferent, 4- disagree and 5- strongly disagree)**

#### SECTION E. IMPACT ON INSTITUTIONS, SUPPLIES AND OUT-PATIENT CLINICS

1. Do you have designated isolation wards for COVID-19 patients in your hospital?

Yes ( ) No ( )

2. Do you have children with COVID-19 being managed in your hospital?

Yes ( ) No ( )

- 1  
2  
3 3. Have you managed COVID-19 positive children with surgical condition in your  
4 centre? Yes ( ) No ( )  
5  
6 If Yes, how many of such patients? .....
- 7  
8 4. Do you still run out-patient clinics in your hospital?  
9  
10 Yes ( ) No ( )  
11  
12 5. Do you have an official telemedicine platform for patient follow up in your hospital?  
13 Yes ( ) No ( )  
14  
15 6. We have adequate supply of PPE for every surgery now:  
16 1( ) 2( ) 3( ) 4( ) 5( )  
17  
18 7. We have adequate supply of PPE for every surgery for the next 3 months:  
19 1( ) 2( ) 3( ) 4( ) 5( )  
20  
21 8. My hospital is coping well with the COVID-19 pandemic:  
22 1( ) 2( ) 3( ) 4( ) 5( )  
23  
24  
25  
26  
27  
28

#### SECTION F. IMPACT ON ACADEMIC TRAINING

29  
30 1. How are you carrying out academic programs in your hospital during this COVID-19  
31 pandemic?  
32

- 33  WhatsApp chatting  
34  
35  Video conferencing  
36  
37  Physical meetings with social distancing  
38  
39  No academic activity at the moment  
40  
41  
42  
43

44 Thank you for your time.  
45  
46  
47  
48  
49  
50  
51  
52  
53  
54  
55  
56  
57  
58  
59  
60

# BMJ Paediatrics Open

## Early Impact of COVID-19 Pandemic on Paediatric Surgical Practice in Nigeria: a National Survey of Paediatric Surgeons.

|                               |                                                                                                                                                                                                                                                                              |
|-------------------------------|------------------------------------------------------------------------------------------------------------------------------------------------------------------------------------------------------------------------------------------------------------------------------|
| Journal:                      | <i>BMJ Paediatrics Open</i>                                                                                                                                                                                                                                                  |
| Manuscript ID                 | bmjpo-2020-000732.R2                                                                                                                                                                                                                                                         |
| Article Type:                 | Original research                                                                                                                                                                                                                                                            |
| Date Submitted by the Author: | 27-Jun-2020                                                                                                                                                                                                                                                                  |
| Complete List of Authors:     | Ogundele, Ibukunolu; Olabisi Onabanjo University Teaching Hospital, Surgery<br>Alakaloko, Felix; Lagos University Teaching Hospital, Surgery<br>Nwokoro, Collins; Olabisi Onabanjo University Teaching Hospital, Surgery<br>Ameh, Emmanuel; National Hospital Abuja, Surgery |
| Keywords:                     | Health services research                                                                                                                                                                                                                                                     |
|                               |                                                                                                                                                                                                                                                                              |

SCHOLARONE™  
Manuscripts



I, the Submitting Author has the right to grant and does grant on behalf of all authors of the Work (as defined in the below author licence), an exclusive licence and/or a non-exclusive licence for contributions from authors who are: i) UK Crown employees; ii) where BMJ has agreed a CC-BY licence shall apply, and/or iii) in accordance with the terms applicable for US Federal Government officers or employees acting as part of their official duties; on a worldwide, perpetual, irrevocable, royalty-free basis to BMJ Publishing Group Ltd ("BMJ") its licensees and where the relevant Journal is co-owned by BMJ to the co-owners of the Journal, to publish the Work in this journal and any other BMJ products and to exploit all rights, as set out in our [licence](#).

The Submitting Author accepts and understands that any supply made under these terms is made by BMJ to the Submitting Author unless you are acting as an employee on behalf of your employer or a postgraduate student of an affiliated institution which is paying any applicable article publishing charge ("APC") for Open Access articles. Where the Submitting Author wishes to make the Work available on an Open Access basis (and intends to pay the relevant APC), the terms of reuse of such Open Access shall be governed by a Creative Commons licence – details of these licences and which [Creative Commons](#) licence will apply to this Work are set out in our licence referred to above.

Other than as permitted in any relevant BMJ Author's Self Archiving Policies, I confirm this Work has not been accepted for publication elsewhere, is not being considered for publication elsewhere and does not duplicate material already published. I confirm all authors consent to publication of this Work and authorise the granting of this licence.



**TITLE PAGE****Title:**

**Early Impact of COVID-19 Pandemic on Paediatric Surgical Practice in Nigeria: a National Survey of Paediatric Surgeons.**

**Authors:**

**I.O. Ogundele<sup>1</sup>, F.M. Alakaloko<sup>2</sup>, C.C. Nwokoro<sup>1</sup>, E.A. Ameh<sup>3</sup>.**

<sup>1</sup>Division of Paediatric Surgery, Department of Surgery, Olabisi Onabanjo University Teaching Hospital, Ogun state. Nigeria.

<sup>2</sup>Paediatric Surgery Unit, Department of Surgery, Lagos University Teaching Hospital, Lagos State. Nigeria.

<sup>3</sup>Division of Paediatric Surgery, Department of Surgery, National Hospital, Abuja FCT. Nigeria.

**Corresponding Author:**

Ibukunolu O. Ogundele

Department of Surgery, Olabisi Onabanjo University Teaching Hospital, PMB 2001, Sagamu, Ogun State, Nigeria.

E-mail address: [ogundeleibk@gmail.com](mailto:ogundeleibk@gmail.com)

Telephone: +234 802 532 0480

**Competing Interests:** All authors declare no conflicts of interest.

**Funding:** This research received no specific grant from any funding agency in the public, commercial or not-for-profit sectors.

**Contributorship:** IOO and FMA conceived the research idea. IOO, FMA and CCN conducted the survey. IOO, FMA and EAA made the drafts of the manuscript. All the authors made substantive contributions to the intellectual content and reporting of the work described in this article. They all read and approved the final manuscript. IOO and FMA are responsible for the overall content as guarantors.

**Ethics Approval:** Health Research Ethics Committee of Olabisi Onabanjo University Teaching Hospital, Sagamu, Ogun State, Nigeria. OOUTH/HREC/339/2020AP.

**Word Count:** 2 202.

## ABSTRACT

**Introduction** The novel Coronavirus disease has had significant impact on healthcare globally. Knowledge of this virus is evolving, definitive care is not yet known, and mortality is increasing. We assessed its initial impact on paediatric surgical practice in Nigeria, creating a benchmark for recommendations and future reference.

**Methods** Survey of 120 paediatric surgeons from 50 centres to assess socio-demographics and specific domains of impact of COVID-19 on their services and training in Nigeria. Seventy four surgeons from the 50 centres adequately responded. Valid responses were represented as categorical data and presented in percentages. Duplicate submissions for centres were excluded by combining and taking the average of responses from centres with multiple respondents.

**Results** Response rate was 74(61%). Forty-six (92%) centres had suspended elective surgeries. All centres continued emergency surgeries but volume reduced in March by 31%. Eleven (22%) centres reported 13 suspended elective cases presenting as emergencies in March, accounting for 3% of total emergency surgeries. Twelve (24%) centres adopted new modalities for managing selected surgical conditions: non-operative reduction of intussusception in 1(2%), antibiotic management of uncomplicated acute appendicitis in 5(10%), more conservative management of trauma and replacement of laparoscopic appendectomy with open surgery in 3(6%) respectively. Low perception of adequacy of Personal Protective Equipment (PPE) was reported in 35(70%) centres. Forty (80%) centres did not offer telemedicine for patients follow up. Twenty-nine (58%) centres had suspended academic training. Perception of safety to operate was low in 37(50%) respondents, indifferent in 24% and high in 26%.

**Conclusion** Majority of paediatric surgical centres reported cessation of elective surgeries whilst continuing emergencies. There was however an acute decline in the volume of emergency surgeries. Adequate PPE need to be provided and preparations towards handling

1  
2  
3 backlog of elective surgeries once the pandemic recedes. Further study is planned to more  
4  
5 conclusively understand the full impact of this pandemic on children's surgery.  
6  
7  
8  
9  
10

11 **Key words:** pandemic, COVID-19, children's surgery.  
12  
13  
14  
15  
16  
17  
18  
19  
20  
21  
22  
23  
24  
25  
26  
27  
28  
29  
30  
31  
32  
33  
34  
35  
36  
37  
38  
39  
40  
41  
42  
43  
44  
45  
46  
47  
48  
49  
50  
51  
52  
53  
54  
55  
56  
57  
58  
59  
60

Confidential: For Review Only

**What is already known**

Anecdotal evidence suggests that elective surgeries in children have been suspended due to COVID-19 pandemic.

**What this study adds**

Our study shows that:

1. Most centres (92%) had suspended elective surgeries.
2. Emergency surgeries were also impacted with reduction from pre-COVID volumes by one-third in March 2020.
3. Some suspended elective cases developed emergent problems and presented as emergencies.
4. One-fifth of centres for the first time adopted non-operative modalities of treatment for selected emergent conditions.

## BACKGROUND

Corona virus disease 19 (COVID-19) is a highly transmissible novel viral illness, caused by severe acute respiratory syndrome coronavirus 2 (SARS-CoV-2) (1). It was reported to have emerged in Wuhan, China, in December 2019 but later spread to other parts of China and other countries of the world (2). This disease poses a huge challenge to health care systems around the world. The U.S. Department of Health and Human Services stated in its 2017 Pandemic Influenza plan update that “emerging viral pandemics can place extraordinary and sustained demands on public health and health systems and on providers of essential community services” (3). The effect may be more profound in regions with already limited resources and fragile health infrastructure. The aim of this study was to carry out a survey of paediatric surgeons in a resource limited setting to assess early effects of the COVID-19 pandemic on their practice in the initial stages of the outbreak. Data obtained would be used for recommendations and future reference.

## METHODS

Relevant information was obtained from paediatric surgeons (consultants and senior registrars) currently practising in Nigeria, using a pre-tested questionnaire (Appendix 1) designed on Microsoft Word version 10 (Microsoft Seattle, WA, USA) and transcribed to google form. The questions were based on 5-point Likert scale (Strongly agree, agree, neither agree nor disagree, disagree, strongly disagree). We circulated the forms to the predetermined group of specialists by email and online chat rooms and kept them open from 10th to 17th April 2020. Daily reminders were also sent.

1  
2  
3 Participants were required to provide socio-demographic data, information on patient traffic  
4 and decision on management of specific conditions, availability of PPE, impact on surgeon's  
5 psyche, their academic programs and institutions infrastructure.  
6  
7  
8

9  
10 A total of 120 paediatric surgeons were sent the survey. Eighty-three paediatric surgeons  
11 responded but 74 were adequately completed. For the purpose of analysis, the 5-point Likert  
12 scale was reduced to 3 points. Strongly agree and agree were merged as agree, neither agree  
13 nor disagree was retained as neutral, disagree and strongly disagree were merged as disagree.  
14  
15  
16  
17  
18

19 Duplicate submissions for centres were excluded by combining and taking the average of  
20 responses from centres with multiple responses.  
21  
22  
23

24 Responses were analysed using SPSS version 22 and presented as categorical data and  
25 percentages.  
26  
27  
28  
29

30  
31 **Patient and Public Involvement statement:** This research was done without patient  
32 involvement. Patients were not invited to comment on the study design and were not consulted  
33 to develop patient relevant outcomes or interpret the results. Patients were not invited to  
34 contribute to the writing or editing of this document for readability or accuracy.  
35  
36  
37  
38  
39

40  
41 **Ethics Approval:** Obtained from the Health Research Ethics Committee of Olabisi Onabanjo  
42 University Teaching Hospital, Sagamu, Ogun State, Nigeria (OOUTH/HREC/339/2020AP).  
43  
44  
45  
46  
47  
48

## 49 RESULTS

### 50 Demographics

51  
52 The response rate was 74(61%). The 74 completed responses represented 50 centres across the  
53 country. Table 1 shows the socio-demographic characteristics of respondents.  
54  
55  
56  
57  
58  
59  
60

**Table: 1** Socio-demographic characteristics of respondents

| Characteristics of respondents | Scores | Percentage |
|--------------------------------|--------|------------|
| 1.Cadre                        | N=74   |            |
| Consultant                     | 45     | 61         |
| Senior-Registrar               | 29     | 39         |
| 2.Gender                       | N=74   |            |
| Male                           | 62     | 84         |
| Female                         | 12     | 16         |
| 3.Work place                   | N=50   |            |
| Public                         | 48     | 96         |
| Private                        | 2      | 4          |
| 4.Type of Health facility      | N=50   |            |
| Teaching hospital              | 39     | 78         |
| Federal Medical Centre         | 10     | 20         |
| General/Specialist Hospital    | 1      | 2          |

### Impact on Surgeries

Elective surgeries had been suspended in 46(92%) centres at the time of this survey. There was a steady decline in the average number of elective surgeries done over 5 months between November 2019 with 993(25% of 5 month total) and March 2020 with 420(10% of total) cases. Similar trend was observed with emergency surgeries which reduced from 822(25% of 5 month total) in November 2019 to 485(15% of total) in March 2020. Comparatively, there were more elective than emergency surgeries per month until March (Figure 1).

1  
2  
3 Twenty (40%) centres suspended their elective surgeries less than 2 weeks prior to the survey  
4  
5 in April, 26(52%) centres stopped a month earlier and 4(8%) had suspended their elective list  
6  
7 for over a month. However, the actual numbers of operations cancelled could not be ascertained  
8  
9 in the present study.  
10

### 11 12 13 **Adverse clinical outcomes**

14  
15  
16 Eleven (22%) centres reported at least one of the elective cases suspended due to COVID-19  
17  
18 pandemic presenting as emergency in March. There were 13 of such patients accounting for an  
19  
20 estimated 3% of the total emergency surgeries for the month. They included inguinoscrotal  
21  
22 hernias (10) with obstruction, sub-acute appendicitis (2) and previously decompressing  
23  
24 anovestibular fistula with intestinal obstruction (1).  
25  
26  
27

### 28 29 **Changes in Management Modality**

30  
31  
32 Nine (18%) centres have newly adopted non-operative modalities for managing selected  
33  
34 surgical conditions in response to the pandemic. One (2%) centre adopted non-operative  
35  
36 reduction of intussusception while 5(10%) centres adopted management of uncomplicated  
37  
38 acute appendicitis with antibiotics and 3(6%) took a more conservative approach to  
39  
40 management of trauma. Three (6%) centres replaced laparoscopic appendectomy with open  
41  
42 surgery.  
43  
44

45  
46 Protocol for the management of urgent cases such as cancers, symptomatic hernias in the early  
47  
48 period of COVID-19 was to continue to immediately operate in 31(62%) centres, delayed  
49  
50 intervention in 12(24%), masterly inactivity in 2(4%) and follow up in 5(10%).  
51  
52

### 53 54 **Impact on Surgeons**

55  
56 Paediatric surgeons' perception of safety to operate during the pandemic and their willingness  
57  
58 to operate on COVID-19 positive patients are shown in figure 2. Perception of safety to operate  
59  
60



1  
2  
3 rated low in half of respondents. No member of the surgical teams had tested positive for  
4  
5 COVID-19 at the time of the survey.  
6  
7

8  
9 Fifty-seven (77%) agreed to a need for paediatric surgeons to have additional training in  
10  
11 management of surgical patients during epidemics, 6(8%) were neutral, while 11(15%)  
12  
13 disagreed. Those willing to attend such training were 47(64%), 15(20%) were neutral and  
14  
15 12(16%) were unwilling.  
16  
17

### 18 **Impact on Institutions, Supplies and Outpatient Clinics**

19  
20  
21 Forty-two (84%) centres had designated isolation wards but only 2(4%) had COVID-19  
22  
23 positive children on admission and none had managed COVID-19 positive children with  
24  
25 surgical condition in their facility at the time of this survey. Majority of centres had low  
26  
27 perception of adequacy of PPE for theatre staff both at the time of survey and at 3 months  
28  
29 afterwards as depicted in Figure 3. Ratings of how institutions are coping with the COVID-19  
30  
31 pandemic was low in 33(66%), intermediate in 14(28%) and high in 3(6%) centres. Forty  
32  
33 (80%) centres do not offer hospital powered telemedicine services for patients follow up  
34  
35 despite lockdown on outpatient clinics.  
36  
37  
38  
39

### 40 **Impact on Academic Training Programs**

41  
42  
43 Twenty-nine (58%) centres had suspended academic training during the pandemic, 13(26%)  
44  
45 engaged “WhatsApp” chat rooms, while 3(6%) made use of Video-conferencing and 5(10%)  
46  
47 still carried out their academic training through physical meetings but with social distancing.  
48  
49  
50  
51  
52  
53

## 54 **DISCUSSION**

55  
56  
57 Pandemics usually run ravaging course with unpredictable health, social and economic  
58  
59 disruptions (4). The impact can be difficult to assess and is an area of active research. While  
60

1  
2  
3 the direct health impact of pandemics can be catastrophic, the indirect impact driven by  
4 depletion of resources and reduced access to routine care can lead to further increase in  
5 morbidity and mortality (4).  
6  
7  
8  
9

10 COVID-19 pandemic is rapidly evolving with unprecedented impact on global health systems.  
11 China, and later the United States, Italy and other European countries became hotspots for the  
12 virus after reporting their first cases in December 2019 and January 2020 respectively (2,5,6).  
13 Travellers from these regions brought in the disease to Africa, including Nigeria in February  
14 2020 (7,8) with a rapid expansion in the number of cases in sub-Saharan Africa (9). The World  
15 Health Organization formally declared COVID-19 outbreak a pandemic on 11th March with  
16 634 813 total confirmed cases as at 29th March, 2020 (10,11). This has sparked various  
17 adaptations in healthcare responses and management, with unpredictable outcomes heightened  
18 by depletion of resources. For example, the only paediatric surgery care facility in Liberia run  
19 by Médecins Sans Frontières (MSF) has been temporarily suspended due to travel restrictions  
20 (12).  
21  
22  
23  
24  
25  
26  
27  
28  
29  
30  
31  
32  
33  
34  
35  
36

37 Children are more susceptible to viral respiratory diseases but ironically, statistics on COVID-  
38 19 have shown low incidence in this age group. An analysis of 72 314 cases of COVID-19  
39 from the Chinese Centre for Disease Control and Prevention showed a low incidence in  
40 children with those younger than 10 years accounting for only 1% of cases (13). A recent  
41 observational cohort study of 36 children with COVID-19 found that all the patients had mild  
42 (47%) or moderate (53%) type of COVID-19 with large proportion (28%) being asymptomatic  
43 (14). Thus, it was initially thought that this clinical pattern of COVID-19 in the paediatric  
44 population could make children important facilitators of viral transmission, and may thus place  
45 providers of health care in them at increased risk of infection (14–16).  
46  
47  
48  
49  
50  
51  
52  
53  
54  
55  
56  
57  
58  
59  
60

1  
2  
3 Our survey showed that majority of the paediatric surgeons have stopped operating on all  
4 elective conditions in both public and private tertiary health institutions to minimise contact  
5  
6 with potential carriers of the virus and conserve resources. This is consistent with the American  
7  
8 College of Surgeons COVID-19: Elective Case Triage Guidelines for Surgical Care which  
9  
10 recommended that surgery should be performed only if delaying the procedure is likely to  
11  
12 prolong hospital stay, increase the likelihood of later hospital admission or cause harm to the  
13  
14 patient (17). A recent article recognises the higher frequency of highly symptomatic patients  
15  
16 on the elective operation list in LMICs compared to HICs but still advocates that truly elective  
17  
18 operations should be postponed to preserve PPE, staff and facility capacity as important  
19  
20 resources during a surge response (18).  
21  
22  
23  
24  
25

26  
27 The ACS advocates that “children who have failed attempts at medical management of a  
28  
29 surgical condition should be considered for surgery” (17). Our study revealed an increased  
30  
31 uptake of non-operative management of some surgical conditions such as intussusception,  
32  
33 uncomplicated appendicitis and some cases of trauma. This modality of care was probably  
34  
35 adopted to reduce exposure to surgery during the pandemic. Outcome of these modifications  
36  
37 in management protocol may be subject to future research.  
38  
39  
40

41  
42 Some suspended elective cases had presented as emergencies. They included incarcerated  
43  
44 inguinoscrotal hernias, sub-acute appendicitis and previously decompressing anovestibular  
45  
46 fistula that developed partial obstruction. This is an indirect impact of the pandemic due to  
47  
48 reduced access to routine care in these patients. Official tele-medicine platforms for follow up  
49  
50 care of patients may aid early detection of complications or other needs for hospital visits while  
51  
52 elective surgeries remain suspended, outpatient clinics locked down and patients are being  
53  
54 given long appointments. Few centres in our survey have an official tele-medicine platform for  
55  
56 follow up care of patients especially during this period of COVID-19 pandemic. The ACS  
57  
58 recommends that tele-medicine and tele-consult services should be used for patient and  
59  
60

1  
2  
3 physician interaction when available (19). There is an urgent need to upscale tele-medicine  
4  
5 services and also to develop protocols for handling backlog of elective surgeries in children in  
6  
7 LMIC once the pandemic recedes.  
8  
9

10  
11 In this report, all centres continued to operate on emergencies and there was consistent monthly  
12  
13 average number of surgeries from November 2019 to February 2020 but a sharp decline in  
14  
15 March 2020. This corresponded with the period of social and economic disruptions which  
16  
17 followed the first confirmed case of COVID-19 in Nigeria reported on 27th February 2020  
18  
19 (8,20). This data shows the need to adopt consensus guidelines tailored to maintain emergency  
20  
21 services in LMIC during this pandemic.  
22  
23

24  
25 Majority of centres had designated isolation wards, but only 4% of them had children with the  
26  
27 virus and none had managed a COVID-19 positive child with surgical condition. Although  
28  
29 local statistics of incidence in children was not available in our literature search, our finding is  
30  
31 suggestive of a low incidence of confirmed COVID-19 in children in Nigeria which is  
32  
33 consistent with global data (13,21). Despite this low incidence in children, about half of  
34  
35 paediatric surgeons in our survey feel unsafe operating on patients during this period and more  
36  
37 are unwilling to operate on confirmed COVID-19 patients. This may be based on the perceived  
38  
39 higher risk of transmissibility of the virus from children to health care workers (14–16). More  
40  
41 recent review articles have however refuted this perception with findings that children are not  
42  
43 more likely than adults to spread the virus (22,23).  
44  
45  
46  
47

48  
49 Majority of centres had suspended academic training during this pandemic. Very few made use  
50  
51 of Video-conferencing. Poor internet connectivity and high cost of subscription in sub-Saharan  
52  
53 Africa may be partly responsible for this poor uptake of video communication (24,25). Online  
54  
55 chat rooms are generally accessible and may be explored as viable media alternative.  
56  
57  
58  
59  
60

1  
2  
3 This research is survey based with attendant limitation of recall. Information obtained is  
4 opinion of the surgeons and does not necessarily represent best practices. Contraction of the  
5 Likert scale to 3 points to simplify the results for analysis may have led to some inaccuracy.  
6  
7  
8 The study however does provide information on early impact of COVID-19 pandemic on  
9  
10  
11  
12  
13  
14  
15  
16  
17  
18  
19  
20  
21  
22  
23  
24  
25  
26  
27  
28  
29  
30  
31  
32  
33  
34  
35  
36  
37  
38  
39  
40  
41  
42  
43  
44  
45  
46  
47  
48  
49  
50  
51  
52  
53  
54  
55  
56  
57  
58  
59  
60

This research is survey based with attendant limitation of recall. Information obtained is opinion of the surgeons and does not necessarily represent best practices. Contraction of the Likert scale to 3 points to simplify the results for analysis may have led to some inaccuracy. The study however does provide information on early impact of COVID-19 pandemic on paediatric surgery in Nigeria to help in beginning to plan towards restarting services and handling future unprecedented situations.

## CONCLUSION

The COVID-19 pandemic has resulted in cessation of elective surgeries and a sharp decline in the number of emergency surgeries performed on children in Nigeria. It is crucial that plans begin on how to handle the backlog of surgeries that would have been created. This may well be institution specific but adequate PPE need to be provided to ensure safety of providers. Further, electronic communication with patients and professional colleagues during the pandemic may help improve the surgical care of children. A follow up study is planned to identify further impacts of the pandemic on children's surgical care.

## References

1. Lai CC, Shih TP, Ko WC, et al (2020) Severe acute respiratory syndrome coronavirus 2 (SARS-CoV-2) and coronavirus disease-2019 (COVID-19): The epidemic and the challenges. *Int J Antimicrob Agents* [Internet]. 55(3):105924. Available from: <https://doi.org/10.1016/j.ijantimicag.2020.105924>
2. Shereen MA, Khan S, Kazmi A, et al (2020) COVID-19 infection: Origin, transmission, and characteristics of human coronaviruses. *J Adv Res* [Internet]. 24:91–8. Available from: <https://doi.org/10.1016/j.jare.2020.03.005>
3. U.S. Department of Health and Human Services. Pandemic Influenza Plan. 2017 Update [Internet]
4. Pandemics: Risks, Impacts, and Mitigation - Disease Control Priorities: Improving Health and Reducing Poverty - NCBI Bookshelf [Internet]. Available from: <https://www.ncbi.nlm.nih.gov/books/NBK525302/>
5. Wang C, Horby PW, Hayden FG, et al (2020) A novel coronavirus outbreak of global health concern. *Lancet* 395(10223):470–3
6. Chiara Severgnini e Redazione Online. Coronavirus, primi due casi in Italia: sono due turisti cinesi - Corriere.it [Internet]. Available from: [https://www.corriere.it/cronache/20\\_gennaio\\_30/coronavirus-italia-corona-9d6dc436-4343-11ea-bdc8-faf1f56f19b7.shtml?refresh\\_ce-cp](https://www.corriere.it/cronache/20_gennaio_30/coronavirus-italia-corona-9d6dc436-4343-11ea-bdc8-faf1f56f19b7.shtml?refresh_ce-cp)
7. World Health Organization. COVID-19 cases top 10 000 in Africa \_ WHO \_ Regional Office for Africa. [Internet]
8. Adepoju P (2020) Nigeria responds to COVID-19; first case detected in sub-Saharan Africa. *Nature medicine* 26:444-448 [Internet]. Available from: <http://www.embase.com/search/results?subaction=viewrecord&from=export&id=L631242957%0Ahttp://dx.doi.org/10.1038/d41591-020-00004-2>
9. Martinez-Alvarez M, Jarde A, Usuf E, et al (2020) COVID-19 pandemic in West Africa. *Lancet Glob Heal* [Internet] 2019(20):2019–20. Available from: [http://dx.doi.org/10.1016/S2214-109X\(20\)30123-6](http://dx.doi.org/10.1016/S2214-109X(20)30123-6)
10. World Health Organization. WHO Director-General’s opening remarks at the media briefing on COVID-19. 11 March 2020 [Internet]. WHO Director General’s speeches.

2020. p. 4. Available from: <https://www.who.int/dg/speeches/detail/who-director-general-s-opening-remarks-at-the-media-briefing-on-covid-19---11-march-2020>
11. World Health Organization. Mariana N (2020) Coronavirus disease 2019 (COVID-19) situation report 69 [Internet]. 2019(3)
  12. COVID-19 Interrupts the Only Pediatric Surgery Care in Liberia \_ Doctors Without Borders - USA.
  13. Zunyou W, Jennifer M (2020) Characteristics of and Important Lessons From the Coronavirus Disease 2019 (COVID-19) Outbreak in China: Summary of a Report of 72 314 Cases From the Chinese Centre for Disease Control and Prevention 323(13)
  14. Qiu H, Wu J, Hong L, et al (2020) Clinical and epidemiological features of 36 children with coronavirus disease 2019 (COVID-19) in Zhejiang, China: an observational cohort study. *Lancet Infect Dis* [Internet] 2019(20):1–8. Available from: [http://dx.doi.org/10.1016/S1473-3099\(20\)30198-5](http://dx.doi.org/10.1016/S1473-3099(20)30198-5)
  15. Kelvin AA, Halperin S (2020) COVID-19 in children : the link in the transmission chain. *Lancet Infect Dis* [Internet] 2(20):2019–20. Available from: [http://dx.doi.org/10.1016/S1473-3099\(20\)30236-X](http://dx.doi.org/10.1016/S1473-3099(20)30236-X)
  16. Fretheim A (2020) The role of children in the transmission of SARS-CoV-2 (COVID-19) – a rapid review [Barns rolle i spredning av SARS-CoV-19 (Covid-19) – en hurtigoversikt] Rapid review, 2020(3): 7-9. Oslo: Folkehelseinstituttet/ Norwegian Institute of Public Health, 2020
  17. American College of Surgeons (2020) COVID 19 : Elective Case Triage Guidelines for Surgical Care. *Am Coll Surg*. [Internet] 24(3):2020.
  18. Weiser TG, Ademuyiwa AO, Capo-chichi N et al (2020) COVID-19 preparedness within the surgical, obstetric and anesthetic ecosystem in Sub Saharan Africa. *Ann Surg* [Internet]
  19. American College of Surgeons. COVID-19 Guidelines for Triage of Pediatric Patients [Internet]. Available from: <https://www.facs.org/covid-19/clinical-guidance/elective-case/pediatric-surgery>
  20. Ehanire O (2020) First case of Coronavirus disease (Covid-19) confirmed in Nigeria. Nigeria Centre for Disease Control. February 28, 2020 [Internet]

- 1  
2  
3  
4  
5  
6  
7  
8  
9  
10  
11  
12  
13  
14  
15  
16  
17  
18  
19  
20  
21  
22  
23  
24  
25  
26  
27  
28  
29  
30  
31  
32  
33  
34  
35  
36  
37  
38  
39  
40  
41  
42  
43  
44  
45  
46  
47  
48  
49  
50  
51  
52  
53  
54  
55  
56  
57  
58  
59  
60
21. She J, Liu L, Liu W (2020) COVID - 19 epidemic : Disease characteristics in children. *J Med Virol.* 2020(3);1–8. <https://doi.org/10.1002/jmv.25807>
  22. Munro APS, Faust SN. Children are not COVID-19 super spreaders: time to go back to school. *Arch Dis Child* 2020;105:618–619. doi:10.1136/archdischild-2020-319474
  23. Rajmil L. Role of children in the transmission of the COVID-19 pandemic: a rapid scoping review. *BMJ Paediatrics Open* 2020;4:e000722. doi:10.1136/bmjpo-2020-000722
  24. Akue-Kpakpo A (2013) Study on international Internet connectivity in sub-Saharan Africa. International Telecommunication Union Telecommunication Development Bureau Place des Nations CH-1211 Geneva 20 Switzerland [www.itu.int](http://www.itu.int) [Internet] 2013(3)
  25. Concerns over high cost of Internet connection – Punch Newspaper [Internet]. November 4, 2018: 26-7



**FIGURES****Figure 1: Cluster bar chart of the mean number of surgeries over 5 months****Figure 2: Perception of safety of paediatric surgeons and willingness to operate****Figure 3: Perception of adequacy of PPE for theatre staff now and in 3 months**

Confidential: For Review Only

1  
2  
3  
4  
5  
6  
7  
8  
9  
10  
11  
12  
13  
14  
15  
16  
17  
18  
19  
20  
21  
22  
23  
24  
25  
26  
27  
28  
29  
30  
31  
32  
33  
34  
35  
36  
37  
38  
39  
40  
41  
42  
43  
44  
45  
46  
47  
48  
49  
50  
51  
52  
53  
54  
55  
56  
57  
58  
59  
60

Figure 1: Cluster column chart of the mean number of surgeries over 5 months

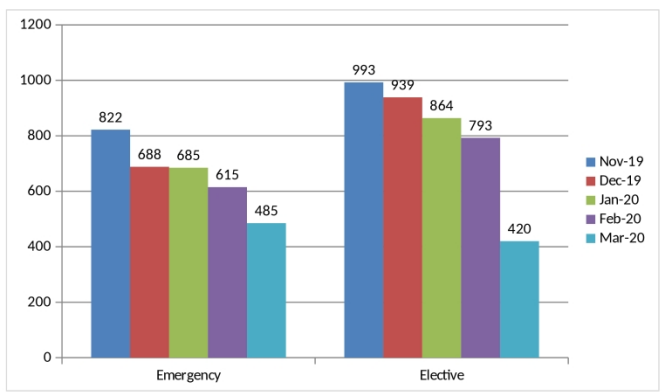

215x279mm (400 x 400 DPI)

1  
2  
3  
4  
5  
6  
7  
8  
9  
10  
11  
12  
13  
14  
15  
16  
17  
18  
19  
20  
21  
22  
23  
24  
25  
26  
27  
28  
29  
30  
31  
32  
33  
34  
35  
36  
37  
38  
39  
40  
41  
42  
43  
44  
45  
46  
47  
48  
49  
50  
51  
52  
53  
54  
55  
56  
57  
58  
59  
60

Figure 2: Perception of safety of paediatric surgeons and willingness to operate

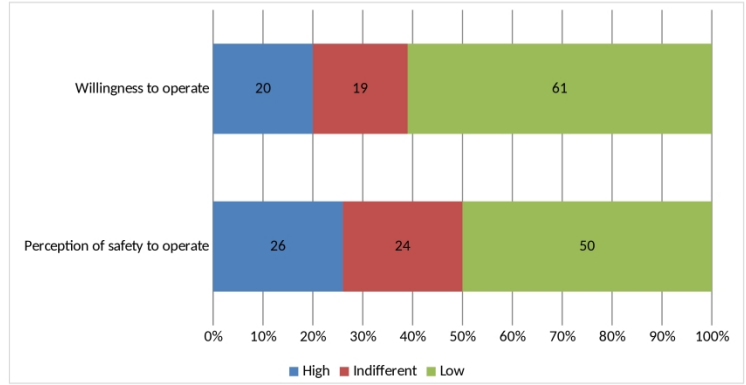

215x279mm (500 x 500 DPI)

1  
2  
3  
4  
5  
6  
7  
8  
9  
10  
11  
12  
13  
14  
15  
16  
17  
18  
19  
20  
21  
22  
23  
24  
25  
26  
27  
28  
29  
30  
31  
32  
33  
34  
35  
36  
37  
38  
39  
40  
41  
42  
43  
44  
45  
46  
47  
48  
49  
50  
51  
52  
53  
54  
55  
56  
57  
58  
59  
60

Figure 3: Perception of adequacy of PPE for theatre staff now and in 3 months

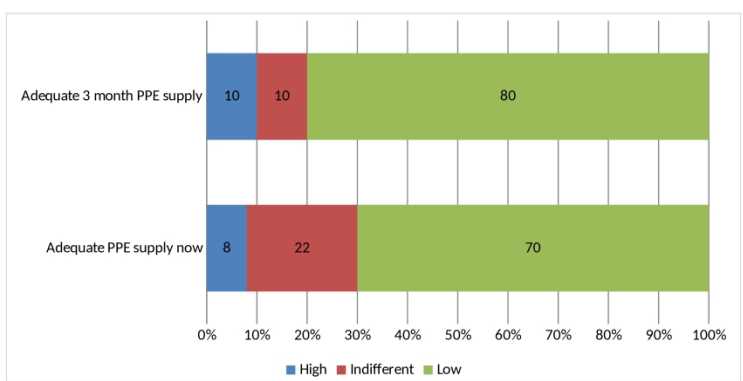

215x279mm (500 x 500 DPI)

## Appendix 1

### Questionnaire

**Title: Early Impact of Covid-19 Pandemic on Paediatric Surgical Practise in Nigeria: a National Survey of Paediatric Surgeons.**

Dear colleague, we are conducting a national survey to assess the “Early Impact of Covid-19 Pandemic on Paediatric Surgical Practise in Nigeria.”

Kindly spare some time to complete this questionnaire. Some of the questions are centre based. All information provided shall be treated with strict confidentiality.

Complete and submit this form only if you consent to information provided being used for the purposes of research.

Thank you.

#### SECTION A. SOCIO-DEMOGRAPHIC DETAILS

1. Gender: Male ( ) Female ( )
2. Age at last birthday (years): .....
3. Cadre: Consultant ( ) Senior Registrar ( )
4. Years of practice of paediatric surgery specialty: .....
5. Location of practice (e.g. Lagos state): .....
6. Current place of work: .....
7. Type of current place of work: Public Hospital ( ) Private Hospital ( )
8. Category of Health Facility:  
Teaching Hospital ( ) Federal Medical Centre ( ) General/specialist Hospital ( )

#### SECTION B. IMPACT ON SURGERIES

1. What is the average number of elective surgeries performed in your centre during the following months?

|               |          |           |           |          |
|---------------|----------|-----------|-----------|----------|
| November 2019 | 1-10 ( ) | 11-20 ( ) | 21-30 ( ) | > 30 ( ) |
| December 2019 | 1-10 ( ) | 11-20 ( ) | 21-30 ( ) | > 30 ( ) |
| January 2020  | 1-10 ( ) | 11-20 ( ) | 21-30 ( ) | > 30 ( ) |
| February 2020 | 1-10 ( ) | 11-20 ( ) | 21-30 ( ) | > 30 ( ) |
| March 2020    | 1-10 ( ) | 11-20 ( ) | 21-30 ( ) | > 30 ( ) |

- 1  
2  
3 2. Do you still take elective surgeries in your hospital? Yes ( ) No ( )  
4  
5 If No, how long have you stopped? <1 week ( ) 1-2 weeks ( ) 3-4 weeks ( )  
6 >4weeks ( )  
7  
8 3. If you have suspended elective surgeries due to COVID-19, have you had any of such  
9 cases present as emergency? Yes ( ) No ( )  
10  
11 If yes, kindly list the number of such cases in your centre, the diagnosis and the age of  
12 patient(s):  
13 .....  
14 .....  
15 .....  
16 .....  
17  
18 4. What is the average number of emergency surgeries performed in your centre during  
19 the following months?  
20  
21 November 2019 1-10 ( ) 11-20 ( ) 21-30 ( ) > 30 ( )  
22  
23 December 2019 1-10 ( ) 11-20 ( ) 21-30 ( ) > 30 ( )  
24  
25 January 2020 1-10 ( ) 11-20 ( ) 21-30 ( ) > 30 ( )  
26  
27 February 2020 1-10 ( ) 11-20 ( ) 21-30 ( ) > 30 ( )  
28  
29 March 2020 1-10 ( ) 11-20 ( ) 21-30 ( ) > 30 ( )  
30  
31 5. State your unit protocol for the management of urgent cases such as cancers,  
32 symptomatic hernias in this period of COVID-19:  
33  
34  Operate immediately  
35  
36  Delayed intervention  
37  
38  See as follow up  
39  
40  Masterly inactivity  
41  
42  
43  
44

**Please answer some of the following questions using a Likert scale of 1-5**

**(1- Strongly agree, 2- agree, 3- indifferent, 4- disagree and 5- strongly disagree)**

**SECTION C. IMPACT ON SURGEONS**

- 45  
46  
47  
48  
49  
50 1. I feel safe operating on patients during the COVID-19 pandemic:  
51  
52 1( ) 2( ) 3( ) 4( ) 5( )  
53  
54 2. I am willing to operate on a confirmed COVID-19 positive patients  
55  
56 1( ) 2( ) 3( ) 4( ) 5( )  
57  
58 3. Has any member of your surgical team tested positive to COVID-19?  
59  
60 Yes ( ) No ( ). If yes, how many? .....

- 1  
2  
3  
4  
5  
6  
7  
8  
9  
10  
11  
12  
13  
14  
15
4. Have you had any formal training on COVID-19 care and preparedness?  
Yes ( ) No ( )
5. Paediatric surgeons need to have additional training in management of surgical patients during epidemics 1( ) 2( ) 3( ) 4( ) 5( )
6. I am willing to attend such training as in 5 above  
1( ) 2( ) 3( ) 4( ) 5( )

#### SECTION D. CHANGES IN MANAGEMENT MODALITY

How has Covid-19 influenced your modality of management of following conditions?

##### 1. Acute appendicitis

- A change to conservative management with antibiotics
- Operative (Open) as usual
- Operative (Laparoscopy) as usual
- Operative (Laparoscopy with HME filter and CO2 filter)
- Change from Laparoscopic to open surgery

##### 2. Uncomplicated intussusception

- Non operative reduction as usual
- Operative reduction as usual
- Change from operative to non-operative reduction
- Change from non-operative to operative reduction

##### 3. Trauma

- No change in management modality
- Attempt to be more conservative in management

**Please answer some of the following questions using a Likert scale of 1-5**

**(1- Strongly agree, 2- agree, 3- indifferent, 4- disagree and 5- strongly disagree)**

#### SECTION E. IMPACT ON INSTITUTIONS, SUPPLIES AND OUT-PATIENT CLINICS

1. Do you have designated isolation wards for COVID-19 patients in your hospital?  
Yes ( ) No ( )

- 1  
2  
3 2. Do you have children with COVID-19 being managed in your hospital?  
4  
5 Yes ( ) No ( )  
6  
7 3. Have you managed COVID-19 positive children with surgical condition in your  
8 centre? Yes ( ) No ( )  
9  
10 If Yes, how many of such patients? .....
- 11  
12 4. Do you still run out-patient clinics in your hospital?  
13  
14 Yes ( ) No ( )  
15  
16 5. Do you have an official telemedicine platform for patient follow up in your hospital?  
17 Yes ( ) No ( )  
18  
19 6. We have adequate supply of PPE for every surgery now:  
20  
21 1( ) 2( ) 3( ) 4( ) 5( )  
22  
23 7. We have adequate supply of PPE for every surgery for the next 3 months:  
24  
25 1( ) 2( ) 3( ) 4( ) 5( )  
26  
27 8. My hospital is coping well with the COVID-19 pandemic:  
28  
29 1( ) 2( ) 3( ) 4( ) 5( )  
30  
31

#### SECTION F. IMPACT ON ACADEMIC TRAINING

32  
33  
34 1. How are you carrying out academic programs in your hospital during this COVID-19  
35 pandemic?  
36

- 37  WhatsApp chatting  
38  
39  Video conferencing  
40  
41  Physical meetings with social distancing  
42  
43  No academic activity at the moment  
44  
45  
46  
47  
48  
49  
50  
51  
52  
53  
54  
55  
56  
57  
58  
59  
60

Thank you for your time.



# BMJ Paediatrics Open

## Early Impact of COVID-19 Pandemic on Paediatric Surgical Practice in Nigeria: a National Survey of Paediatric Surgeons.

|                               |                                                                                                                                                                                                                                                                              |
|-------------------------------|------------------------------------------------------------------------------------------------------------------------------------------------------------------------------------------------------------------------------------------------------------------------------|
| Journal:                      | <i>BMJ Paediatrics Open</i>                                                                                                                                                                                                                                                  |
| Manuscript ID                 | bmjpo-2020-000732.R3                                                                                                                                                                                                                                                         |
| Article Type:                 | Original research                                                                                                                                                                                                                                                            |
| Date Submitted by the Author: | 27-Jul-2020                                                                                                                                                                                                                                                                  |
| Complete List of Authors:     | Ogundele, Ibukunolu; Olabisi Onabanjo University Teaching Hospital, Surgery<br>Alakaloko, Felix; Lagos University Teaching Hospital, Surgery<br>Nwokoro, Collins; Olabisi Onabanjo University Teaching Hospital, Surgery<br>Ameh, Emmanuel; National Hospital Abuja, Surgery |
| Keywords:                     | Health services research                                                                                                                                                                                                                                                     |
|                               |                                                                                                                                                                                                                                                                              |

SCHOLARONE™  
Manuscripts



I, the Submitting Author has the right to grant and does grant on behalf of all authors of the Work (as defined in the below author licence), an exclusive licence and/or a non-exclusive licence for contributions from authors who are: i) UK Crown employees; ii) where BMJ has agreed a CC-BY licence shall apply, and/or iii) in accordance with the terms applicable for US Federal Government officers or employees acting as part of their official duties; on a worldwide, perpetual, irrevocable, royalty-free basis to BMJ Publishing Group Ltd ("BMJ") its licensees and where the relevant Journal is co-owned by BMJ to the co-owners of the Journal, to publish the Work in this journal and any other BMJ products and to exploit all rights, as set out in our [licence](#).

The Submitting Author accepts and understands that any supply made under these terms is made by BMJ to the Submitting Author unless you are acting as an employee on behalf of your employer or a postgraduate student of an affiliated institution which is paying any applicable article publishing charge ("APC") for Open Access articles. Where the Submitting Author wishes to make the Work available on an Open Access basis (and intends to pay the relevant APC), the terms of reuse of such Open Access shall be governed by a Creative Commons licence – details of these licences and which [Creative Commons](#) licence will apply to this Work are set out in our licence referred to above.

Other than as permitted in any relevant BMJ Author's Self Archiving Policies, I confirm this Work has not been accepted for publication elsewhere, is not being considered for publication elsewhere and does not duplicate material already published. I confirm all authors consent to publication of this Work and authorise the granting of this licence.

## TITLE PAGE

### Title:

**Early Impact of COVID-19 Pandemic on Paediatric Surgical Practice in Nigeria: a National Survey of Paediatric Surgeons.**

### Authors:

**I.O. Ogundele<sup>1</sup>, F.M. Alakaloko<sup>2</sup>, C.C. Nwokoro<sup>1</sup>, E.A. Ameh<sup>3</sup>.**

<sup>1</sup>Division of Paediatric Surgery, Department of Surgery, Olabisi Onabanjo University Teaching Hospital, Ogun state. Nigeria.

<sup>2</sup>Paediatric Surgery Unit, Department of Surgery, Lagos University Teaching Hospital, Lagos State. Nigeria.

<sup>3</sup>Division of Paediatric Surgery, Department of Surgery, National Hospital, Abuja FCT. Nigeria.

### Corresponding Author:

Ibukunolu O. Ogundele

Department of Surgery, Olabisi Onabanjo University Teaching Hospital, PMB 2001, Sagamu, Ogun State, Nigeria.

E-mail address: [ogundeleibk@gmail.com](mailto:ogundeleibk@gmail.com)

Telephone: +234 802 532 0480

**Competing Interests:** All authors declare no conflicts of interest.

**Funding:** This research received no specific grant from any funding agency in the public, commercial or not-for-profit sectors.

**Contributorship:** IOO and FMA conceived the research idea. IOO, FMA and CCN conducted the survey. IOO, FMA and EAA made the drafts of the manuscript. All the authors made substantive contributions to the intellectual content and reporting of the work described in this article. They all read and approved the final manuscript. IOO and FMA are responsible for the overall content as guarantors.

**Ethics Approval:** Health Research Ethics Committee of Olabisi Onabanjo University Teaching Hospital, Sagamu, Ogun State, Nigeria. OOUTH/HREC/339/2020AP.

**Word Count:** 2 413.

## ABSTRACT

**Introduction** The novel Coronavirus disease has had significant impact on healthcare globally. Knowledge of this virus is evolving, definitive care is not yet known, and mortality is increasing. We assessed its initial impact on paediatric surgical practice in Nigeria, creating a benchmark for recommendations and future reference.

**Methods** Survey of 120 paediatric surgeons from 50 centres to assess socio-demographics and specific domains of impact of COVID-19 on their services and training in Nigeria. Valid responses were represented as categorical data and presented in percentages. Duplicate submissions for centres were excluded by combining and taking the mean of responses from centres with multiple respondents.

**Results** Response rate was 74(61%). Forty-six(92%) centres had suspended elective surgeries. All centres continued emergency surgeries but volume reduced in March by 31%. Eleven(22%) centres reported 13 suspended elective cases presenting as emergencies in March, accounting for 3% of total emergency surgeries. Twelve(24%) centres adopted new modalities for managing selected surgical conditions: non-operative reduction of intussusception in 1(2%), antibiotic management of uncomplicated acute appendicitis in 5(10%), more conservative management of trauma and replacement of laparoscopic appendectomy with open surgery in 3(6%) respectively. Low perception of adequacy of Personal Protective Equipment (PPE) was reported in 35(70%) centres. Forty(80%) centres did not offer telemedicine for patients follow up. Twenty-nine(58%) centres had suspended academic training. Perception of safety to operate was low in 37(50%) respondents, indifferent in 24% and high in 26%.

**Conclusion** Majority of paediatric surgical centres reported cessation of elective surgeries whilst continuing emergencies. There was however an acute decline in the volume of emergency surgeries. Adequate PPE needs to be provided and preparations towards handling

1  
2  
3 backlog of elective surgeries once the pandemic recedes. Further study is planned to more  
4  
5 conclusively understand the full impact of this pandemic on children's surgery.  
6  
7  
8  
9  
10

11 **Key words:** pandemic, COVID-19, children's surgery.  
12  
13  
14  
15  
16  
17  
18  
19  
20  
21  
22  
23  
24  
25  
26  
27  
28  
29  
30  
31  
32  
33  
34  
35  
36  
37  
38  
39  
40  
41  
42  
43  
44  
45  
46  
47  
48  
49  
50  
51  
52  
53  
54  
55  
56  
57  
58  
59  
60

Confidential: For Review Only

**What is already known**

Anecdotal evidence suggests that elective surgeries in children have been suspended due to COVID-19 pandemic.

**What this study adds**

Our study shows that:

1. Most centres (92%) had suspended elective surgeries.
2. Emergency surgeries were also impacted with reduction from pre-COVID volumes by one-third in March 2020.
3. Some suspended elective cases developed emergent problems and presented as emergencies.
4. One-fifth of centres for the first time adopted non-operative modalities of treatment for selected emergent conditions.

## BACKGROUND

Coronavirus disease 19 (COVID-19) is a highly transmissible novel viral illness, caused by severe acute respiratory syndrome coronavirus 2 (SARS-CoV-2) (1). It was reported to have emerged in Wuhan, China, in December 2019 but later spread to other parts of China and other countries of the world (2). This disease poses a huge challenge to health care systems around the world. The U.S. Department of Health and Human Services stated in its 2017 Pandemic Influenza plan update that “emerging viral pandemics can place extraordinary and sustained demands on public health and health systems and on providers of essential community services” (3). The effect may be more profound in regions with already limited resources and fragile health infrastructure. The aim of this study was to carry out a survey of paediatric surgeons in a resource limited setting to assess early effects of the COVID-19 pandemic on their practice in the initial stages of the outbreak. Data obtained would be used for recommendations and future reference.

## METHODS

Relevant information was obtained from paediatric surgeons (consultants and senior registrars) currently practising in Nigeria, using a pre-tested questionnaire (Appendix 1) designed on Microsoft Word version 10 (Microsoft Seattle, WA, USA) and transcribed to google form. The questions were based on 5-point Likert scale (Strongly agree, agree, neither agree nor disagree, disagree, strongly disagree). We circulated the forms to the predetermined group of specialists by email and online chat rooms and kept them open from 10th to 17th April 2020. Daily reminders were also sent.

1  
2  
3 Participants were required to provide socio-demographic data, information on patient traffic  
4 and decision on management of specific conditions, availability of PPE, impact on surgeon's  
5  
6  
7  
8  
9  
10  
11  
12  
13  
14  
15  
16  
17  
18  
19  
20  
21  
22  
23  
24  
25  
26  
27  
28  
29  
30  
31  
32  
33  
34  
35  
36  
37  
38  
39  
40  
41  
42  
43  
44  
45  
46  
47  
48  
49  
50  
51  
52  
53  
54  
55  
56  
57  
58  
59  
60

Participants were required to provide socio-demographic data, information on patient traffic and decision on management of specific conditions, availability of PPE, impact on surgeon's psyche, their academic programs and institutions infrastructure.

For the purpose of analysis, the 5-point Likert scale was reduced to 3 points. Strongly agree and agree were merged as agree, neither agree nor disagree was retained as neutral, disagree and strongly disagree were merged as disagree.

Duplicate submissions for centres were excluded by combining and taking the mean of responses from centres with multiple responses.

Responses were analysed using SPSS version 22 and presented as categorical data and percentages.

**Patient and Public Involvement statement:** This research was done without patient involvement. Patients were not invited to comment on the study design and were not consulted to develop patient relevant outcomes or interpret the results. Patients were not invited to contribute to the writing or editing of this document for readability or accuracy.

**Ethics Approval:** Obtained from the Health Research Ethics Committee of Olabisi Onabanjo University Teaching Hospital, Sagamu, Ogun State, Nigeria (OOUTH/HREC/339/2020AP).

## RESULTS

### Demographics

A total of 120 paediatric surgeons from 50 centres were sent the survey. Eighty-three paediatric surgeons responded but 74 forms were adequately completed resulting in a response rate of 61%. The 74 completed responses represented the 50 centres across the country. Table 1 shows the socio-demographic characteristics of respondents.



**Table: 1** Socio-demographic characteristics of respondents

| Characteristics of respondents | Scores | Percentage |
|--------------------------------|--------|------------|
| 1.Cadre                        | N=74   |            |
| Consultant                     | 45     | 61         |
| Senior-Registrar               | 29     | 39         |
| 2.Gender                       | N=74   |            |
| Male                           | 62     | 84         |
| Female                         | 12     | 16         |
| 3.Work place                   | N=50   |            |
| Public                         | 48     | 96         |
| Private                        | 2      | 4          |
| 4.Type of Health facility      | N=50   |            |
| Teaching hospital              | 39     | 78         |
| Federal Medical Centre         | 10     | 20         |
| General/Specialist Hospital    | 1      | 2          |

### Impact on Surgeries

Elective surgeries had been suspended in 46(92%) centres at the time of this survey. There was a steady decline in the average number of elective surgeries done over 5 months between November 2019 with 993(25% of 5 month total) and March 2020 with 420(10% of total) cases. Similar trend was observed with emergency surgeries which reduced from 822(25% of 5 month total) in November 2019 to 485(15% of total) in March 2020. Comparatively, there were more elective than emergency surgeries per month until March (Figure 1).

1  
2  
3 Twenty(40%) centres suspended their elective surgeries less than 2 weeks prior to the survey  
4  
5 in April, 26(52%) centres stopped a month earlier and 4(8%) had suspended their elective list  
6  
7 for over a month.  
8  
9

### 10 **Adverse clinical outcomes**

11  
12  
13 Eleven(22%) centres reported at least one of the elective cases suspended due to COVID-19  
14  
15 pandemic presenting as emergency in March. There were 13 of such patients accounting for an  
16  
17 estimated 3% of the total emergency surgeries for the month. They included inguinoscrotal  
18  
19 hernias (10) with obstruction, sub-acute appendicitis (2) and previously decompressing  
20  
21 anovestibular fistula with intestinal obstruction (1).  
22  
23  
24  
25

### 26 **Changes in Management Modality**

27  
28  
29 Nine(18%) centres have newly adopted non-operative modalities for managing selected  
30  
31 surgical conditions in response to the pandemic. One(2%) centre adopted non-operative  
32  
33 reduction of intussusception while 5(10%) centres adopted management of uncomplicated  
34  
35 acute appendicitis with antibiotics and 3(6%) took a more conservative approach to  
36  
37 management of trauma. Three(6%) centres replaced laparoscopic appendectomy with open  
38  
39 surgery.  
40  
41  
42

43  
44 Protocol for the management of urgent cases such as cancers, symptomatic hernias in the early  
45  
46 period of COVID-19 was to continue to immediately operate in 31(62%) centres, delayed  
47  
48 intervention in 12(24%), watchful waiting in 2(4%) and follow up in 5(10%).  
49  
50

### 51 **Impact on Surgeons**

52  
53  
54 Paediatric surgeons' perception of safety to operate during the pandemic and their willingness  
55  
56 to operate on COVID-19 positive patients are shown in figure 2. Perception of safety to operate  
57  
58  
59  
60

1  
2  
3 rated low in half of respondents. No member of the surgical teams had tested positive for  
4  
5 COVID-19 at the time of the survey.  
6  
7

8  
9 Fifty-seven(77%) agreed to a need for paediatric surgeons to have additional training in  
10  
11 management of surgical patients during epidemics, 6(8%) were neutral, while 11(15%)  
12  
13 disagreed. Those willing to attend such training were 47(64%), 15(20%) were neutral and  
14  
15 12(16%) were unwilling.  
16  
17

### 18 **Impact on Institutions, Supplies and Outpatient Clinics**

19  
20  
21 Forty-two(84%) centres had designated isolation wards but only 2(4%) had COVID-19  
22  
23 positive children on admission and none had managed COVID-19 positive children with  
24  
25 surgical conditions in their facility at the time of this survey. Majority of centres had low  
26  
27 perception of adequacy of PPE for theatre staff both at the time of survey and at 3 months  
28  
29 afterwards as depicted in Figure 3. Ratings of how institutions are coping with the COVID-19  
30  
31 pandemic was low in 33(66%), intermediate in 14(28%) and high in 3(6%) centres. Forty  
32  
33 (80%) centres do not offer hospital powered telemedicine services for patients follow up  
34  
35 despite lockdown on outpatient clinics.  
36  
37  
38  
39

### 40 **Impact on Academic Training Programs**

41  
42  
43 Twenty-nine(58%) centres had suspended academic training during the pandemic, 13(26%)  
44  
45 engaged “WhatsApp” chat rooms, while 3(6%) made use of Video-conferencing and 5(10%)  
46  
47 still carried out their academic training through physical meetings but with social distancing.  
48  
49  
50  
51  
52  
53

## 54 **DISCUSSION**

55  
56  
57 Pandemics usually run ravaging courses with unpredictable health, social and economic  
58  
59 disruptions (4). The impact can be difficult to assess and is an area of active research. While  
60

1  
2  
3 the direct health impact of pandemics can be catastrophic, the indirect impact driven by  
4 depletion of resources and reduced access to routine care can lead to further increase in  
5 morbidity and mortality (4).  
6  
7  
8  
9

10 COVID-19 pandemic is rapidly evolving with unprecedented impact on global health systems.  
11 China, and later the United States, Italy and other European countries became hotspots for the  
12 virus after reporting their first cases in December 2019 and January 2020 respectively (2,5,6).  
13 Travellers from these regions brought in the disease to Africa, including Nigeria in February  
14 2020 (7,8) with a rapid expansion in the number of cases in sub-Saharan Africa (9). The World  
15 Health Organization formally declared COVID-19 outbreak a pandemic on 11th March with  
16 634 813 total confirmed cases as at 29th March, 2020 (10,11). This has sparked various  
17 adaptations in healthcare responses and management, with unpredictable outcomes heightened  
18 by depletion of resources. For example, the only paediatric surgery care facility in Liberia run  
19 by Médecins Sans Frontières (MSF) has been temporarily suspended due to travel restrictions  
20 (12).  
21  
22  
23  
24  
25  
26  
27  
28  
29  
30  
31  
32  
33  
34  
35  
36

37 Children are more susceptible to viral respiratory diseases but ironically, statistics on COVID-  
38 19 have shown low incidence in this age group. An analysis of 72 314 cases of COVID-19  
39 from the Chinese Centre for Disease Control and Prevention showed a low incidence in  
40 children with those younger than 10 years accounting for only 1% of cases (13). A recent  
41 observational cohort study of 36 children with COVID-19 found that all the patients had mild  
42 (47%) or moderate (53%) types of COVID-19 with a large proportion (28%) being  
43 asymptomatic (14). Thus, it was initially thought that this clinical pattern of COVID-19 in the  
44 paediatric population could make children important facilitators of viral transmission, and may  
45 thus place providers of health care in them at increased risk of infection (14–16).  
46  
47  
48  
49  
50  
51  
52  
53  
54  
55  
56  
57  
58  
59  
60

1  
2  
3 Our survey showed that majority of the paediatric surgeons have stopped operating on all  
4 elective conditions in both public and private tertiary health institutions to minimise contact  
5 with potential carriers of the virus and conserve resources. This is consistent with the American  
6 College of Surgeons COVID-19: Elective Case Triage Guidelines for Surgical Care which  
7 recommended that surgery should be performed only if delaying the procedure is likely to  
8 prolong hospital stay, increase the likelihood of later hospital admission or cause harm to the  
9 patient (17). A recent article recognises the higher frequency of highly symptomatic patients  
10 on the elective operation list in LMICs compared to HICs but still advocates that truly elective  
11 operations should be postponed to preserve PPE, staff and facility capacity as important  
12 resources during a surge response (18).  
13  
14  
15  
16  
17  
18  
19  
20  
21  
22  
23  
24  
25  
26

27 The ACS advocates that “children who have failed attempts at medical management of a  
28 surgical condition should be considered for surgery” (17). Our study revealed an increased  
29 uptake of non-operative management of some surgical conditions such as intussusception,  
30 uncomplicated appendicitis and some cases of trauma. This modality of care was probably  
31 adopted to reduce exposure to surgery during the pandemic. Outcome of these modifications  
32 in management protocol may be subject to future research.  
33  
34  
35  
36  
37  
38  
39  
40

41 Some suspended elective cases had presented as emergencies. They included incarcerated  
42 inguinoscrotal hernias, sub-acute appendicitis and previously decompressing anovestibular  
43 fistula that developed partial obstruction. There is also potential of poorer outcomes for patients  
44 with cancer and other urgent cases that have been cancelled but may not necessarily return as  
45 emergency. The effect of delay on the outcomes for these patients may not be recognised until  
46 a later date (or at all if they die without re-accessing paediatric surgical care at the tertiary  
47 hospitals). These are indirect impacts of the pandemic due to reduced access to routine care.  
48 Official tele-medicine platforms for follow up care of patients may aid early detection of  
49 complications or other needs for hospital visits while elective surgeries remain suspended,  
50  
51  
52  
53  
54  
55  
56  
57  
58  
59  
60

1  
2  
3 outpatient clinics locked down and patients are being given long appointments. Few centres in  
4  
5 our survey have an official tele-medicine platform for follow up care of patients especially  
6  
7 during this period of COVID-19 pandemic. The ACS recommends that tele-medicine and tele-  
8  
9 consult services should be used for patient and physician interaction when available (19). There  
10  
11 is an urgent need to upscale tele-medicine services and also to develop protocols for handling  
12  
13 backlog of elective surgeries in children in LMIC once the pandemic recedes.  
14  
15

16  
17 In this report, all centres continued to operate on emergencies and there was consistent monthly  
18  
19 average number of surgeries from November 2019 to February 2020 but a sharp decline in  
20  
21 March 2020. This corresponded with the period of social and economic disruptions which  
22  
23 followed the first confirmed case of COVID-19 in Nigeria reported on 27th February 2020  
24  
25 (8,20). This data shows the need to adopt consensus guidelines tailored to maintain emergency  
26  
27 services in LMIC during this pandemic. Follow up studies may also evaluate the case mix of  
28  
29 emergency surgeries during the period of decline and determine if certain categories of diseases  
30  
31 were more affected than others, e.g. neonates with congenital anomalies are more likely to be  
32  
33 dying in the community as a result of reduced access to paediatric surgical care during the  
34  
35 pandemic.  
36  
37  
38  
39

40  
41 Majority of centres had designated isolation wards, but only 4% of them had children with the  
42  
43 virus and none had managed a COVID-19 positive child with surgical condition. Although  
44  
45 local statistics of incidence in children was not available in our literature search, our finding is  
46  
47 suggestive of a low incidence of confirmed COVID-19 in children in Nigeria which is  
48  
49 consistent with global data (13,21). Despite this low incidence in children, about half of  
50  
51 paediatric surgeons in our survey feel unsafe operating on patients during this period and more  
52  
53 are unwilling to operate on confirmed COVID-19 patients. This may be based on the perceived  
54  
55 higher risk of transmissibility of the virus from children to health care workers (14–16). More  
56  
57 recent review articles have however refuted this perception with findings that children are not  
58  
59  
60

1  
2  
3 more likely than adults to spread the virus (22,23). Also, no paediatric surgeon tested positive  
4 to COVID-19 at the time of this survey. Although anecdotal evidence is that no surgeon had  
5 been tested at the time of our survey, as our National Centre for Disease Control (NCDC)  
6 guideline is to test symptomatic individuals and close contacts of confirmed patients (24).  
7  
8  
9

10  
11 Majority of centres had suspended academic training during this pandemic. Very few made use  
12 of Video-conferencing. Poor internet connectivity and high cost of subscription in sub-Saharan  
13 Africa may be partly responsible for this poor uptake of video communication (25,26). Online  
14 chat rooms are generally accessible and may be explored as viable media alternatives.  
15  
16  
17  
18  
19

20 This research is survey based with attendant limitation of recall. Information obtained is  
21 opinion of the surgeons and does not necessarily represent best practices. Only surgeons were  
22 interviewed since the teams in all the centres studied were led by surgeons and we felt their  
23 opinions would be representative in this early survey. The actual numbers of operations  
24 cancelled could not be ascertained in the present study. We shall however include anaesthetists,  
25 nurses and other colleagues and attempt to determine actual numbers of operations cancelled  
26 in our follow up study. Contraction of the Likert scale to 3 points to simplify the results for  
27 analysis may have led to some inaccuracy. The study however does provide information on  
28 early impact of COVID-19 pandemic on paediatric surgery in Nigeria to help in beginning to  
29 plan towards restarting services and handling future unprecedented situations.  
30  
31  
32  
33  
34  
35  
36  
37  
38  
39  
40  
41  
42  
43  
44  
45  
46  
47  
48  
49

## 50 CONCLUSION

51  
52 The COVID-19 pandemic has resulted in cessation of elective surgeries and a sharp decline in  
53 the number of emergency surgeries performed on children in Nigeria. It is crucial that plans  
54 begin on how to handle the backlog of surgeries that would have been created. This may well  
55 be institution specific but adequate PPE needs to be provided to ensure safety of providers.  
56  
57  
58  
59  
60

1  
2  
3 Further, electronic communication with patients and professional colleagues during the  
4 pandemic may help improve the surgical care of children. A follow up study is planned to  
5  
6 identify further impacts of the pandemic on children's surgical care.  
7  
8  
9  
10  
11  
12  
13  
14  
15  
16  
17  
18  
19  
20  
21  
22  
23  
24  
25  
26  
27  
28  
29  
30  
31  
32  
33  
34  
35  
36  
37  
38  
39  
40  
41  
42  
43  
44  
45  
46  
47  
48  
49  
50  
51  
52  
53  
54  
55  
56  
57  
58  
59  
60

Confidential: For Review Only



## References

1. Lai CC, Shih TP, Ko WC, et al (2020) Severe acute respiratory syndrome coronavirus 2 (SARS-CoV-2) and coronavirus disease-2019 (COVID-19): The epidemic and the challenges. *Int J Antimicrob Agents* [Internet]. 55(3):105924. Available from: <https://doi.org/10.1016/j.ijantimicag.2020.105924>
2. Shereen MA, Khan S, Kazmi A, et al (2020) COVID-19 infection: Origin, transmission, and characteristics of human coronaviruses. *J Adv Res* [Internet]. 24:91–8. Available from: <https://doi.org/10.1016/j.jare.2020.03.005>
3. U.S. Department of Health and Human Services. Pandemic Influenza Plan. 2017 Update [Internet]
4. Pandemics: Risks, Impacts, and Mitigation - Disease Control Priorities: Improving Health and Reducing Poverty - NCBI Bookshelf [Internet]. Available from: <https://www.ncbi.nlm.nih.gov/books/NBK525302/>
5. Wang C, Horby PW, Hayden FG, et al (2020) A novel coronavirus outbreak of global health concern. *Lancet* 395(10223):470–3
6. Chiara Severgnini e Redazione Online. Coronavirus, primi due casi in Italia: sono due turisti cinesi - Corriere.it [Internet]. Available from: [https://www.corriere.it/cronache/20\\_gennaio\\_30/coronavirus-italia-corona-9d6dc436-4343-11ea-bdc8-faf1f56f19b7.shtml?refresh\\_ce-cp](https://www.corriere.it/cronache/20_gennaio_30/coronavirus-italia-corona-9d6dc436-4343-11ea-bdc8-faf1f56f19b7.shtml?refresh_ce-cp)
7. World Health Organization. COVID-19 cases top 10 000 in Africa \_ WHO \_ Regional Office for Africa. [Internet]
8. Adepoju P (2020) Nigeria responds to COVID-19; first case detected in sub-Saharan Africa. *Nature medicine* 26:444-448 [Internet]. Available from: <http://www.embase.com/search/results?subaction=viewrecord&from=export&id=L631242957%0Ahttp://dx.doi.org/10.1038/d41591-020-00004-2>
9. Martinez-Alvarez M, Jarde A, Usuf E, et al (2020) COVID-19 pandemic in West Africa. *Lancet Glob Heal* [Internet] 2019(20):2019–20. Available from: [http://dx.doi.org/10.1016/S2214-109X\(20\)30123-6](http://dx.doi.org/10.1016/S2214-109X(20)30123-6)
10. World Health Organization. WHO Director-General’s opening remarks at the media briefing on COVID-19. 11 March 2020 [Internet]. WHO Director General’s speeches.

2020. p. 4. Available from: <https://www.who.int/dg/speeches/detail/who-director-general-s-opening-remarks-at-the-media-briefing-on-covid-19---11-march-2020>
11. World Health Organization. Mariana N (2020) Coronavirus disease 2019 (COVID-19) situation report 69 [Internet]. 2019(3)
  12. COVID-19 Interrupts the Only Pediatric Surgery Care in Liberia \_ Doctors Without Borders - USA.
  13. Zunyou W, Jennifer M (2020) Characteristics of and Important Lessons From the Coronavirus Disease 2019 (COVID-19) Outbreak in China: Summary of a Report of 72 314 Cases From the Chinese Centre for Disease Control and Prevention 323(13)
  14. Qiu H, Wu J, Hong L, et al (2020) Clinical and epidemiological features of 36 children with coronavirus disease 2019 (COVID-19) in Zhejiang, China: an observational cohort study. *Lancet Infect Dis* [Internet] 2019(20):1–8. Available from: [http://dx.doi.org/10.1016/S1473-3099\(20\)30198-5](http://dx.doi.org/10.1016/S1473-3099(20)30198-5)
  15. Kelvin AA, Halperin S (2020) COVID-19 in children : the link in the transmission chain. *Lancet Infect Dis* [Internet] 2(20):2019–20. Available from: [http://dx.doi.org/10.1016/S1473-3099\(20\)30236-X](http://dx.doi.org/10.1016/S1473-3099(20)30236-X)
  16. Fretheim A (2020) The role of children in the transmission of SARS-CoV-2 (COVID-19) – a rapid review [Barns rolle i spredning av SARS-CoV-19 (Covid-19) – en hurtigoversikt] Rapid review, 2020(3): 7-9. Oslo: Folkehelseinstituttet/ Norwegian Institute of Public Health, 2020
  17. American College of Surgeons (2020) COVID 19 : Elective Case Triage Guidelines for Surgical Care. *Am Coll Surg*. [Internet] 24(3):2020
  18. Weiser TG, Ademuyiwa AO, Capo-chichi N et al (2020) COVID-19 preparedness within the surgical, obstetric and anesthetic ecosystem in Sub Saharan Africa. *Ann Surg* [Internet]
  19. American College of Surgeons. COVID-19 Guidelines for Triage of Pediatric Patients [Internet]. Available from: <https://www.facs.org/covid-19/clinical-guidance/elective-case/pediatric-surgery>
  20. Ehanire O (2020) First case of Coronavirus disease (Covid-19) confirmed in Nigeria. Nigeria Centre for Disease Control. February 28, 2020 [Internet]

- 1
  - 2
  - 3
  - 4
  - 5
  - 6
  - 7
  - 8
  - 9
  - 10
  - 11
  - 12
  - 13
  - 14
  - 15
  - 16
  - 17
  - 18
  - 19
  - 20
  - 21
  - 22
  - 23
  - 24
  - 25
  - 26
  - 27
  - 28
  - 29
  - 30
  - 31
  - 32
  - 33
  - 34
  - 35
  - 36
  - 37
  - 38
  - 39
  - 40
  - 41
  - 42
  - 43
  - 44
  - 45
  - 46
  - 47
  - 48
  - 49
  - 50
  - 51
  - 52
  - 53
  - 54
  - 55
  - 56
  - 57
  - 58
  - 59
  - 60
21. She J, Liu L, Liu W (2020) COVID - 19 epidemic : Disease characteristics in children. *J Med Virol.* 2020(3);1–8. <https://doi.org/10.1002/jmv.25807>
22. Munro APS, Faust SN. Children are not COVID-19 super spreaders: time to go back to school. *Arch Dis Child* 2020;105:618–619. doi:10.1136/archdischild-2020-319474
23. Rajmil L. Role of children in the transmission of the COVID-19 pandemic: a rapid scoping review. *BMJ Paediatrics Open* 2020;4:e000722. doi:10.1136/bmjpo-2020-000722
24. Federal Ministry of Health. Nigeria Centre for Disease Control. Strategies to Improve Surveillance for COVID-19. Guidance for States [Internet]. Available from: <https://covid19.ncdc.gov.ng/media/files/SurveillanceStrategies>
25. Akue-Kpakpo A (2013) Study on international Internet connectivity in sub-Saharan Africa. International Telecommunication Union Telecommunication Development Bureau Place des Nations CH-1211 Geneva 20 Switzerland [www.itu.int](http://www.itu.int) [Internet] 2013(3)
26. Concerns over high cost of Internet connection – Punch Newspaper [Internet]. November 4, 2018: 26-7

**FIGURES**

**Figure 1: Cluster bar chart of the mean number of surgeries over 5 months**

**Figure 2: Perception of safety of paediatric surgeons and willingness to operate**

**Figure 3: Perception of adequacy of PPE for theatre staff now and in 3 months**

Confidential: For Review Only

1  
2  
3  
4  
5  
6  
7  
8  
9  
10  
11  
12  
13  
14  
15  
16  
17  
18  
19  
20  
21  
22  
23  
24  
25  
26  
27  
28  
29  
30  
31  
32  
33  
34  
35  
36  
37  
38  
39  
40  
41  
42  
43  
44  
45  
46  
47  
48  
49  
50  
51  
52  
53  
54  
55  
56  
57  
58  
59  
60

1  
2  
3  
4  
5  
6  
7  
8  
9  
10  
11  
12  
13  
14  
15  
16  
17  
18  
19  
20  
21  
22  
23  
24  
25  
26  
27  
28  
29  
30  
31  
32  
33  
34  
35  
36  
37  
38  
39  
40  
41  
42  
43  
44  
45  
46  
47  
48  
49  
50  
51  
52  
53  
54  
55  
56  
57  
58  
59  
60

Figure 1: Cluster column chart of the mean number of surgeries over 5 months

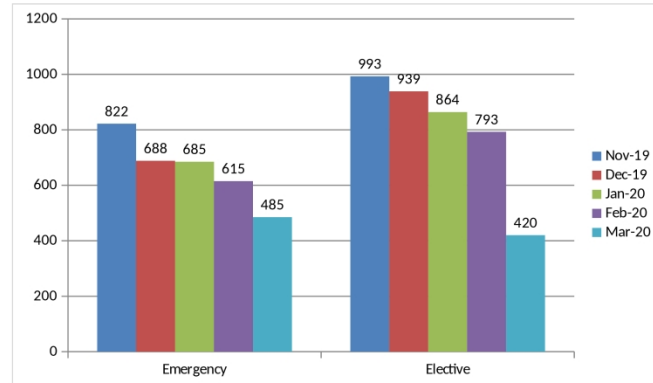

215x279mm (400 x 400 DPI)

1  
2  
3  
4  
5  
6  
7  
8  
9  
10  
11  
12  
13  
14  
15  
16  
17  
18  
19  
20  
21  
22  
23  
24  
25  
26  
27  
28  
29  
30  
31  
32  
33  
34  
35  
36  
37  
38  
39  
40  
41  
42  
43  
44  
45  
46  
47  
48  
49  
50  
51  
52  
53  
54  
55  
56  
57  
58  
59  
60

Figure 2: Perception of safety of paediatric surgeons and willingness to operate

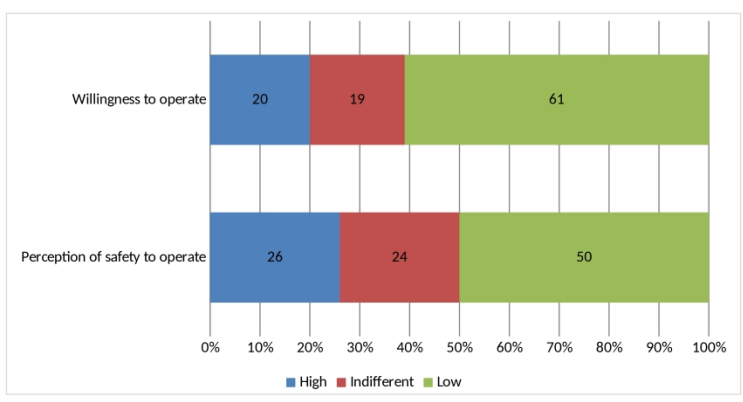

215x279mm (500 x 500 DPI)

1  
2  
3  
4  
5  
6  
7  
8  
9  
10  
11  
12  
13  
14  
15  
16  
17  
18  
19  
20  
21  
22  
23  
24  
25  
26  
27  
28  
29  
30  
31  
32  
33  
34  
35  
36  
37  
38  
39  
40  
41  
42  
43  
44  
45  
46  
47  
48  
49  
50  
51  
52  
53  
54  
55  
56  
57  
58  
59  
60

Figure 3: Perception of adequacy of PPE for theatre staff now and in 3 months

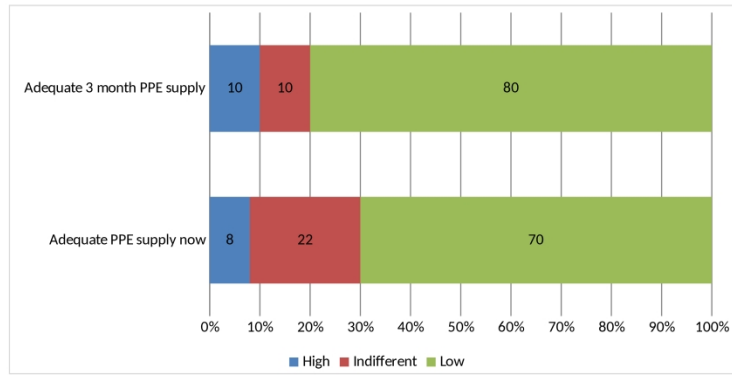

215x279mm (500 x 500 DPI)

## Appendix 1

### Questionnaire

**Title: Early Impact of Covid-19 Pandemic on Paediatric Surgical Practise in Nigeria: a National Survey of Paediatric Surgeons.**

Dear colleague, we are conducting a national survey to assess the “Early Impact of Covid-19 Pandemic on Paediatric Surgical Practise in Nigeria.”

Kindly spare some time to complete this questionnaire. Some of the questions are centre based. All information provided shall be treated with strict confidentiality.

Complete and submit this form only if you consent to information provided being used for the purposes of research.

Thank you.

#### SECTION A. SOCIO-DEMOGRAPHIC DETAILS

1. Gender: Male ( ) Female ( )
2. Age at last birthday (years): .....
3. Cadre: Consultant ( ) Senior Registrar ( )
4. Years of practice of paediatric surgery specialty: .....
5. Location of practice (e.g. Lagos state): .....
6. Current place of work: .....
7. Type of current place of work: Public Hospital ( ) Private Hospital ( )
8. Category of Health Facility:  
Teaching Hospital ( ) Federal Medical Centre ( ) General/specialist Hospital ( )

#### SECTION B. IMPACT ON SURGERIES

1. What is the average number of elective surgeries performed in your centre during the following months?

|               |          |           |           |          |
|---------------|----------|-----------|-----------|----------|
| November 2019 | 1-10 ( ) | 11-20 ( ) | 21-30 ( ) | > 30 ( ) |
| December 2019 | 1-10 ( ) | 11-20 ( ) | 21-30 ( ) | > 30 ( ) |
| January 2020  | 1-10 ( ) | 11-20 ( ) | 21-30 ( ) | > 30 ( ) |
| February 2020 | 1-10 ( ) | 11-20 ( ) | 21-30 ( ) | > 30 ( ) |
| March 2020    | 1-10 ( ) | 11-20 ( ) | 21-30 ( ) | > 30 ( ) |



2. Do you still take elective surgeries in your hospital? Yes ( ) No ( )  
 If No, how long have you stopped? <1 week ( ) 1-2 weeks ( ) 3-4 weeks ( )  
 >4weeks ( )

3. If you have suspended elective surgeries due to COVID-19, have you had any of such cases present as emergency? Yes ( ) No ( )  
 If yes, kindly list the number of such cases in your centre, the diagnosis and the age of patient(s):  
 .....  
 .....  
 .....

4. What is the average number of emergency surgeries performed in your centre during the following months?

|               |          |           |           |          |
|---------------|----------|-----------|-----------|----------|
| November 2019 | 1-10 ( ) | 11-20 ( ) | 21-30 ( ) | > 30 ( ) |
| December 2019 | 1-10 ( ) | 11-20 ( ) | 21-30 ( ) | > 30 ( ) |
| January 2020  | 1-10 ( ) | 11-20 ( ) | 21-30 ( ) | > 30 ( ) |
| February 2020 | 1-10 ( ) | 11-20 ( ) | 21-30 ( ) | > 30 ( ) |
| March 2020    | 1-10 ( ) | 11-20 ( ) | 21-30 ( ) | > 30 ( ) |

5. State your unit protocol for the management of urgent cases such as cancers, symptomatic hernias in this period of COVID-19:

Operate immediately

Delayed intervention

See as follow up

Masterly inactivity

**Please answer some of the following questions using a Likert scale of 1-5 (1- Strongly agree, 2- agree, 3- indifferent, 4- disagree and 5- strongly disagree)**

**SECTION C. IMPACT ON SURGEONS**

1. I feel safe operating on patients during the COVID-19 pandemic:  
 1( ) 2( ) 3( ) 4( ) 5( )

2. I am willing to operate on a confirmed COVID-19 positive patients  
 1( ) 2( ) 3( ) 4( ) 5( )

3. Has any member of your surgical team tested positive to COVID-19?  
 Yes ( ) No ( ). If yes, how many? .....

- 1  
2  
3 4. Have you had any formal training on COVID-19 care and preparedness?  
4  
5 Yes ( ) No ( )  
6  
7 5. Paediatric surgeons need to have additional training in management of surgical  
8 patients during epidemics 1( ) 2( ) 3( ) 4( ) 5( )  
9  
10 6. I am willing to attend such training as in 5 above  
11  
12 1( ) 2( ) 3( ) 4( ) 5( )  
13  
14  
15

#### SECTION D. CHANGES IN MANAGEMENT MODALITY

How has Covid-19 influenced your modality of management of following conditions?

##### 1. Acute appendicitis

- A change to conservative management with antibiotics  
 Operative (Open) as usual  
 Operative (Laparoscopy) as usual  
 Operative (Laparoscopy with HME filter and CO2 filter)  
 Change from Laparoscopic to open surgery

##### 2. Uncomplicated intussusception

- Non operative reduction as usual  
 Operative reduction as usual  
 Change from operative to non-operative reduction  
 Change from non-operative to operative reduction

##### 3. Trauma

- No change in management modality  
 Attempt to be more conservative in management

**Please answer some of the following questions using a Likert scale of 1-5**

**(1- Strongly agree, 2- agree, 3- indifferent, 4- disagree and 5- strongly disagree)**

#### SECTION E. IMPACT ON INSTITUTIONS, SUPPLIES AND OUT-PATIENT CLINICS

1. Do you have designated isolation wards for COVID-19 patients in your hospital?  
Yes ( ) No ( )

- 1  
2  
3  
4  
5  
6  
7  
8  
9  
10  
11  
12  
13  
14  
15  
16  
17  
18  
19  
20  
21  
22  
23  
24  
25  
26  
27  
28  
29  
30  
31
2. Do you have children with COVID-19 being managed in your hospital?  
Yes ( ) No ( )
3. Have you managed COVID-19 positive children with surgical condition in your centre? Yes ( ) No ( )  
If Yes, how many of such patients? .....
4. Do you still run out-patient clinics in your hospital?  
Yes ( ) No ( )
5. Do you have an official telemedicine platform for patient follow up in your hospital?  
Yes ( ) No ( )
6. We have adequate supply of PPE for every surgery now:  
1( ) 2( ) 3( ) 4( ) 5( )
7. We have adequate supply of PPE for every surgery for the next 3 months:  
1( ) 2( ) 3( ) 4( ) 5( )
8. My hospital is coping well with the COVID-19 pandemic:  
1( ) 2( ) 3( ) 4( ) 5( )

#### SECTION F. IMPACT ON ACADEMIC TRAINING

1. How are you carrying out academic programs in your hospital during this COVID-19 pandemic?

- WhatsApp chatting
- Video conferencing
- Physical meetings with social distancing
- No academic activity at the moment

Thank you for your time.
