# Supplementary material for: Early impact of COVID-19 pandemic on paediatric surgical practice in Nigeria: a national survey of paediatric surgeons
Source: PubMed Central journal article supplement — BMJ Paediatr Open. 2020 Sep 1;4(1):e000732. doi: 10.1136/bmjpo-2020-000732 (PMC7467520; doi:10.1136/bmjpo-2020-000732), 2020-09-01
Supplement: bmjpo-2020-000732supp001.pdf [file bmjpo-2020-000732supp001.pdf]

## Appendix 1

### Questionnaire

#### **Title: Early Impact of Covid-19 Pandemic on Paediatric Surgical Practise in Nigeria: a National Survey of Paediatric Surgeons.**

Dear colleague, we are conducting a national survey to assess the “Early Impact of Covid-19 Pandemic on Paediatric Surgical Practise in Nigeria.”

Kindly spare some time to complete this questionnaire. Some of the questions are centre based. All information provided shall be treated with strict confidentiality.

Complete and submit this form only if you consent to information provided being used for the purposes of research.

Thank you.

#### SECTION A. SOCIO-DEMOGRAPHIC DETAILS

1. Gender: Male ( ) Female ( )
2. Age at last birthday (years): .....
3. Cadre: Consultant ( ) Senior Registrar ( )
4. Years of practice of paediatric surgery specialty: .....
5. Location of practice (e.g. Lagos state): .....
6. Current place of work: .....
7. Type of current place of work: Public Hospital ( ) Private Hospital ( )
8. Category of Health Facility:  
Teaching Hospital ( ) Federal Medical Centre ( ) General/specialist Hospital ( )

#### SECTION B. IMPACT ON SURGERIES

1. What is the average number of elective surgeries performed in your centre during the following months?

|               |          |           |           |          |
|---------------|----------|-----------|-----------|----------|
| November 2019 | 1-10 ( ) | 11-20 ( ) | 21-30 ( ) | > 30 ( ) |
| December 2019 | 1-10 ( ) | 11-20 ( ) | 21-30 ( ) | > 30 ( ) |
| January 2020  | 1-10 ( ) | 11-20 ( ) | 21-30 ( ) | > 30 ( ) |
| February 2020 | 1-10 ( ) | 11-20 ( ) | 21-30 ( ) | > 30 ( ) |
| March 2020    | 1-10 ( ) | 11-20 ( ) | 21-30 ( ) | > 30 ( ) |

2. Do you still take elective surgeries in your hospital? Yes ( ) No ( )  
If No, how long have you stopped? <1 week ( ) 1-2 weeks ( ) 3-4 weeks ( ) >4weeks ( )
3. If you have suspended elective surgeries due to COVID-19, have you had any of such cases present as emergency? Yes ( ) No ( )  
If yes, kindly list the number of such cases in your centre, the diagnosis and the age of patient(s):  
.....  
.....  
.....
4. What is the average number of emergency surgeries performed in your centre during the following months?
- |               |          |           |           |          |
|---------------|----------|-----------|-----------|----------|
| November 2019 | 1-10 ( ) | 11-20 ( ) | 21-30 ( ) | > 30 ( ) |
| December 2019 | 1-10 ( ) | 11-20 ( ) | 21-30 ( ) | > 30 ( ) |
| January 2020  | 1-10 ( ) | 11-20 ( ) | 21-30 ( ) | > 30 ( ) |
| February 2020 | 1-10 ( ) | 11-20 ( ) | 21-30 ( ) | > 30 ( ) |
| March 2020    | 1-10 ( ) | 11-20 ( ) | 21-30 ( ) | > 30 ( ) |
5. State your unit protocol for the management of urgent cases such as cancers, symptomatic hernias in this period of COVID-19:
- Operate immediately
- Delayed intervention
- See as follow up
- Masterly inactivity

**Please answer some of the following questions using a Likert scale of 1-5**

**(1- Strongly agree, 2- agree, 3- indifferent, 4- disagree and 5- strongly disagree)**

**SECTION C. IMPACT ON SURGEONS**

1. I feel safe operating on patients during the COVID-19 pandemic:  
1( ) 2( ) 3( ) 4( ) 5( )
2. I am willing to operate on a confirmed COVID-19 positive patients  
1( ) 2( ) 3( ) 4( ) 5( )
3. Has any member of your surgical team tested positive to COVID-19?  
Yes ( ) No ( ). If yes, how many? .....

4. Have you had any formal training on COVID-19 care and preparedness?  
Yes ( ) No ( )
5. Paediatric surgeons need to have additional training in management of surgical patients during epidemics 1( ) 2( ) 3( ) 4( ) 5( )
6. I am willing to attend such training as in 5 above  
1( ) 2( ) 3( ) 4( ) 5( )

#### SECTION D. CHANGES IN MANAGEMENT MODALITY

How has Covid-19 influenced your modality of management of following conditions?

1. Acute appendicitis

- A change to conservative management with antibiotics
- Operative (Open) as usual
- Operative (Laparoscopy) as usual
- Operative (Laparoscopy with HME filter and CO2 filter)
- Change from Laparoscopic to open surgery

2. Uncomplicated intussusception

- Non operative reduction as usual
- Operative reduction as usual
- Change from operative to non-operative reduction
- Change from non-operative to operative reduction

3. Trauma

- No change in management modality
- Attempt to be more conservative in management

**Please answer some of the following questions using a Likert scale of 1-5**

**(1- Strongly agree, 2- agree, 3- indifferent, 4- disagree and 5- strongly disagree)**

#### SECTION E. IMPACT ON INSTITUTIONS, SUPPLIES AND OUT-PATIENT CLINICS

1. Do you have designated isolation wards for COVID-19 patients in your hospital?  
Yes ( ) No ( )

2. Do you have children with COVID-19 being managed in your hospital?  
Yes ( ) No ( )
3. Have you managed COVID-19 positive children with surgical condition in your centre? Yes ( ) No ( )  
If Yes, how many of such patients? .....
4. Do you still run out-patient clinics in your hospital?  
Yes ( ) No ( )
5. Do you have an official telemedicine platform for patient follow up in your hospital?  
Yes ( ) No ( )
6. We have adequate supply of PPE for every surgery now:  
1( ) 2( ) 3( ) 4( ) 5( )
7. We have adequate supply of PPE for every surgery for the next 3 months:  
1( ) 2( ) 3( ) 4( ) 5( )
8. My hospital is coping well with the COVID-19 pandemic:  
1( ) 2( ) 3( ) 4( ) 5( )

#### SECTION F. IMPACT ON ACADEMIC TRAINING

1. How are you carrying out academic programs in your hospital during this COVID-19 pandemic?

- WhatsApp chatting
- Video conferencing
- Physical meetings with social distancing
- No academic activity at the moment

Thank you for your time.
